# Supplementary material for: Tuning a small electron polaron in FePO4 by P-site or O-site doping based on DFT+U and KMC simulation
Source: Royal Society of Chemistry journal article supplement (doi:10.1039/d2cp06034e), 2023-01-01
Supplement: d2cp06034e1.xlsx [file d2cp06034e1.xlsx]

## Sheet: README
1. There are all the calculated data of the pristine system (FePO4) and the doped systems (FeP1-αXαO4 and FePO4-βZβ).
2. Path is the shorthand of hop path, Fe-1toFe-11 means the polaron hops from Fe-1 to Fe-11.
3. hoping_distance represents the hopping distance between two adjacent iron atoms.
4. abatic_barrier_energy means adiabatic activation energies E_act^adi.
5. DeltaQ2 is the generalized configuration coordinate when t = 1.
6. The fit_R_2 is the coefficient of determination when performing quadratic fitting by using the energy obtained by calculating E^dia (R(t)) of a series of t values (t = 0.03, 0.06, 0.09, 0.12 or t = 0.97, 0.94, 0.91, 0.88) subtracting the initial state energy (DelE= reconfig_energy * t^2).
7. fit_diff_2_sum is the Sum of squares of error when performing quadratic fitting to get the Adiabatic curve.
8. root_T_or_F represents whether two fitting adiabatic curves (from the left to right or from the right to left) of the hoping path have real root in the middle of the hopping path. TRUE means that real root exists.
9. Effective_Mass is the effective mass defined in equation (8).
10. reconfig_energy is the reorganization energy. DelE= reconfig_energy * t^2 to fit yields
11. diabati_active_energy is the diabatic activation energies E_act^dia.
12. V_ab is electronic coupling constant H_ab.
13. DelE = A * DeltaQ2, so A is the DelE(t=1) / DeltaQ2.
14. Omega is got by the square root of twice A and means 2Pi times the effective phonon frequency (2pi * v_eff).
15. v_eff is the effective phonon frequency, unit is Hz.
16. pi_2_gamma is 2Pi times the adiabaticity parameter (2pi * γ) defined in equation (12).
17.P_LZ is the Landau-Zener transition probability, which is defined in equation (11).
18. kappa_el is the electron transfer coefficient defined in equation (10).
19. k_ET_adiabatic is the polaron adiabatic hopping rates defined in equation (13).
20. k_ET_diabatic(Hz) is the polaron diabatic hopping rates defined in equation (14).

## Sheet: Fe16(PO4)16
path	hoping_distance(Å)	abatic_barrier_energy(eV)	DeltaQ2	fit_R_2	fit_diff_2_sum	root_T_or_F	Effective_Mass	reconfig_energy(eV)	diabati_active_energy(eV)	V_ab(eV)	A	Omega	v_eff(Hz)	pi_2_gamma	P_LZ	kappa_el	k_ET_adiabatic(Hz)	k_ET_diabatic
Fe-1toFe-11	3.87012	0.143	4.9676	0.999975	6.8e-09	TRUE	19.243	0.871657	0.217821	0.0748209	0.175468	5.81553e+13	9256370000000	5.42753	0.995571	0.997792	36575151643	22075041053
Fe-1toFe-10	3.87012	0.143	4.9676	0.999975	6.8e-09	TRUE	19.243	0.871657	0.217821	0.0748209	0.175468	5.81553e+13	9256370000000	5.42753	0.995571	0.997792	36575151643	22075041053
Fe-1toFe-12	3.87012	0.143	4.9676	0.999975	6.8e-09	TRUE	19.243	0.871657	0.217821	0.0748209	0.175468	5.81553e+13	9256370000000	5.42753	0.995571	0.997792	36575151643	22075041053
Fe-1toFe-9	3.87012	0.143	4.9676	0.999975	6.8e-09	TRUE	19.243	0.871657	0.217821	0.0748209	0.175468	5.81553e+13	9256370000000	5.42753	0.995571	0.997792	36575151643	22075041053
Fe-2toFe-11	3.87012	0.143	4.9676	0.999975	6.8e-09	TRUE	19.243	0.871657	0.217821	0.0748209	0.175468	5.81553e+13	9256370000000	5.42753	0.995571	0.997792	36575151643	22075041053
Fe-2toFe-10	3.87012	0.143	4.9676	0.999975	6.8e-09	TRUE	19.243	0.871657	0.217821	0.0748209	0.175468	5.81553e+13	9256370000000	5.42753	0.995571	0.997792	36575151643	22075041053
Fe-2toFe-12	3.87012	0.143	4.9676	0.999975	6.8e-09	TRUE	19.243	0.871657	0.217821	0.0748209	0.175468	5.81553e+13	9256370000000	5.42753	0.995571	0.997792	36575151643	22075041053
Fe-2toFe-9	3.87012	0.143	4.9676	0.999975	6.8e-09	TRUE	19.243	0.871657	0.217821	0.0748209	0.175468	5.81553e+13	9256370000000	5.42753	0.995571	0.997792	36575151643	22075041053
Fe-3toFe-10	3.87012	0.143	4.9676	0.999975	6.8e-09	TRUE	19.243	0.871657	0.217821	0.0748209	0.175468	5.81553e+13	9256370000000	5.42753	0.995571	0.997792	36575151643	22075041053
Fe-3toFe-11	3.87012	0.143	4.9676	0.999975	6.8e-09	TRUE	19.243	0.871657	0.217821	0.0748209	0.175468	5.81553e+13	9256370000000	5.42753	0.995571	0.997792	36575151643	22075041053
Fe-3toFe-9	3.87012	0.143	4.9676	0.999975	6.8e-09	TRUE	19.243	0.871657	0.217821	0.0748209	0.175468	5.81553e+13	9256370000000	5.42753	0.995571	0.997792	36575151643	22075041053
Fe-3toFe-12	3.87012	0.143	4.9676	0.999975	6.8e-09	TRUE	19.243	0.871657	0.217821	0.0748209	0.175468	5.81553e+13	9256370000000	5.42753	0.995571	0.997792	36575151643	22075041053
Fe-4toFe-10	3.87012	0.143	4.9676	0.999975	6.8e-09	TRUE	19.243	0.871657	0.217821	0.0748209	0.175468	5.81553e+13	9256370000000	5.42753	0.995571	0.997792	36575151643	22075041053
Fe-4toFe-11	3.87012	0.143	4.9676	0.999975	6.8e-09	TRUE	19.243	0.871657	0.217821	0.0748209	0.175468	5.81553e+13	9256370000000	5.42753	0.995571	0.997792	36575151643	22075041053
Fe-4toFe-9	3.87012	0.143	4.9676	0.999975	6.8e-09	TRUE	19.243	0.871657	0.217821	0.0748209	0.175468	5.81553e+13	9256370000000	5.42753	0.995571	0.997792	36575151643	22075041053
Fe-4toFe-12	3.87012	0.143	4.9676	0.999975	6.8e-09	TRUE	19.243	0.871657	0.217821	0.0748209	0.175468	5.81553e+13	9256370000000	5.42753	0.995571	0.997792	36575151643	22075041053
Fe-5toFe-13	3.87012	0.143	4.9676	0.999975	6.8e-09	TRUE	19.243	0.871657	0.217821	0.0748209	0.175468	5.81553e+13	9256370000000	5.42753	0.995571	0.997792	36575151643	22075041053
Fe-5toFe-14	3.87012	0.143	4.9676	0.999975	6.8e-09	TRUE	19.243	0.871657	0.217821	0.0748209	0.175468	5.81553e+13	9256370000000	5.42753	0.995571	0.997792	36575151643	22075041053
Fe-5toFe-16	3.87012	0.143	4.9676	0.999975	6.8e-09	TRUE	19.243	0.871657	0.217821	0.0748209	0.175468	5.81553e+13	9256370000000	5.42753	0.995571	0.997792	36575151643	22075041053
Fe-5toFe-15	3.87012	0.143	4.9676	0.999975	6.8e-09	TRUE	19.243	0.871657	0.217821	0.0748209	0.175468	5.81553e+13	9256370000000	5.42753	0.995571	0.997792	36575151643	22075041053
Fe-6toFe-14	3.87012	0.143	4.9676	0.999975	6.8e-09	TRUE	19.243	0.871657	0.217821	0.0748209	0.175468	5.81553e+13	9256370000000	5.42753	0.995571	0.997792	36575151643	22075041053
Fe-6toFe-13	3.87012	0.143	4.9676	0.999975	6.8e-09	TRUE	19.243	0.871657	0.217821	0.0748209	0.175468	5.81553e+13	9256370000000	5.42753	0.995571	0.997792	36575151643	22075041053
Fe-6toFe-15	3.87012	0.143	4.9676	0.999975	6.8e-09	TRUE	19.243	0.871657	0.217821	0.0748209	0.175468	5.81553e+13	9256370000000	5.42753	0.995571	0.997792	36575151643	22075041053
Fe-6toFe-16	3.87012	0.143	4.9676	0.999975	6.8e-09	TRUE	19.243	0.871657	0.217821	0.0748209	0.175468	5.81553e+13	9256370000000	5.42753	0.995571	0.997792	36575151643	22075041053
Fe-7toFe-16	3.87012	0.143	4.9676	0.999975	6.8e-09	TRUE	19.243	0.871657	0.217821	0.0748209	0.175468	5.81553e+13	9256370000000	5.42753	0.995571	0.997792	36575151643	22075041053
Fe-7toFe-15	3.87012	0.143	4.9676	0.999975	6.8e-09	TRUE	19.243	0.871657	0.217821	0.0748209	0.175468	5.81553e+13	9256370000000	5.42753	0.995571	0.997792	36575151643	22075041053
Fe-7toFe-13	3.87012	0.143	4.9676	0.999975	6.8e-09	TRUE	19.243	0.871657	0.217821	0.0748209	0.175468	5.81553e+13	9256370000000	5.42753	0.995571	0.997792	36575151643	22075041053
Fe-7toFe-14	3.87012	0.143	4.9676	0.999975	6.8e-09	TRUE	19.243	0.871657	0.217821	0.0748209	0.175468	5.81553e+13	9256370000000	5.42753	0.995571	0.997792	36575151643	22075041053
Fe-8toFe-15	3.87012	0.143	4.9676	0.999975	6.8e-09	TRUE	19.243	0.871657	0.217821	0.0748209	0.175468	5.81553e+13	9256370000000	5.42753	0.995571	0.997792	36575151643	22075041053
Fe-8toFe-16	3.87012	0.143	4.9676	0.999975	6.8e-09	TRUE	19.243	0.871657	0.217821	0.0748209	0.175468	5.81553e+13	9256370000000	5.42753	0.995571	0.997792	36575151643	22075041053
Fe-8toFe-14	3.87012	0.143	4.9676	0.999975	6.8e-09	TRUE	19.243	0.871657	0.217821	0.0748209	0.175468	5.81553e+13	9256370000000	5.42753	0.995571	0.997792	36575151643	22075041053
Fe-8toFe-13	3.87012	0.143	4.9676	0.999975	6.8e-09	TRUE	19.243	0.871657	0.217821	0.0748209	0.175468	5.81553e+13	9256370000000	5.42753	0.995571	0.997792	36575151643	22075041053
Fe-9toFe-1	3.87012	0.143	4.9676	0.999975	6.8e-09	TRUE	19.243	0.871657	0.217821	0.0748209	0.175468	5.81553e+13	9256370000000	5.42753	0.995571	0.997792	36575151643	22075041053
Fe-9toFe-2	3.87012	0.143	4.9676	0.999975	6.8e-09	TRUE	19.243	0.871657	0.217821	0.0748209	0.175468	5.81553e+13	9256370000000	5.42753	0.995571	0.997792	36575151643	22075041053
Fe-9toFe-3	3.87012	0.143	4.9676	0.999975	6.8e-09	TRUE	19.243	0.871657	0.217821	0.0748209	0.175468	5.81553e+13	9256370000000	5.42753	0.995571	0.997792	36575151643	22075041053
Fe-9toFe-4	3.87012	0.143	4.9676	0.999975	6.8e-09	TRUE	19.243	0.871657	0.217821	0.0748209	0.175468	5.81553e+13	9256370000000	5.42753	0.995571	0.997792	36575151643	22075041053
Fe-10toFe-1	3.87012	0.143	4.9676	0.999975	6.8e-09	TRUE	19.243	0.871657	0.217821	0.0748209	0.175468	5.81553e+13	9256370000000	5.42753	0.995571	0.997792	36575151643	22075041053
Fe-10toFe-2	3.87012	0.143	4.9676	0.999975	6.8e-09	TRUE	19.243	0.871657	0.217821	0.0748209	0.175468	5.81553e+13	9256370000000	5.42753	0.995571	0.997792	36575151643	22075041053
Fe-10toFe-3	3.87012	0.143	4.9676	0.999975	6.8e-09	TRUE	19.243	0.871657	0.217821	0.0748209	0.175468	5.81553e+13	9256370000000	5.42753	0.995571	0.997792	36575151643	22075041053
Fe-10toFe-4	3.87012	0.143	4.9676	0.999975	6.8e-09	TRUE	19.243	0.871657	0.217821	0.0748209	0.175468	5.81553e+13	9256370000000	5.42753	0.995571	0.997792	36575151643	22075041053
Fe-11toFe-3	3.87012	0.143	4.9676	0.999975	6.8e-09	TRUE	19.243	0.871657	0.217821	0.0748209	0.175468	5.81553e+13	9256370000000	5.42753	0.995571	0.997792	36575151643	22075041053
Fe-11toFe-4	3.87012	0.143	4.9676	0.999975	6.8e-09	TRUE	19.243	0.871657	0.217821	0.0748209	0.175468	5.81553e+13	9256370000000	5.42753	0.995571	0.997792	36575151643	22075041053
Fe-11toFe-1	3.87012	0.143	4.9676	0.999975	6.8e-09	TRUE	19.243	0.871657	0.217821	0.0748209	0.175468	5.81553e+13	9256370000000	5.42753	0.995571	0.997792	36575151643	22075041053
Fe-11toFe-2	3.87012	0.143	4.9676	0.999975	6.8e-09	TRUE	19.243	0.871657	0.217821	0.0748209	0.175468	5.81553e+13	9256370000000	5.42753	0.995571	0.997792	36575151643	22075041053
Fe-12toFe-3	3.87012	0.143	4.9676	0.999975	6.8e-09	TRUE	19.243	0.871657	0.217821	0.0748209	0.175468	5.81553e+13	9256370000000	5.42753	0.995571	0.997792	36575151643	22075041053
Fe-12toFe-4	3.87012	0.143	4.9676	0.999975	6.8e-09	TRUE	19.243	0.871657	0.217821	0.0748209	0.175468	5.81553e+13	9256370000000	5.42753	0.995571	0.997792	36575151643	22075041053
Fe-12toFe-1	3.87012	0.143	4.9676	0.999975	6.8e-09	TRUE	19.243	0.871657	0.217821	0.0748209	0.175468	5.81553e+13	9256370000000	5.42753	0.995571	0.997792	36575151643	22075041053
Fe-12toFe-2	3.87012	0.143	4.9676	0.999975	6.8e-09	TRUE	19.243	0.871657	0.217821	0.0748209	0.175468	5.81553e+13	9256370000000	5.42753	0.995571	0.997792	36575151643	22075041053
Fe-13toFe-7	3.87012	0.143	4.9676	0.999975	6.8e-09	TRUE	19.243	0.871657	0.217821	0.0748209	0.175468	5.81553e+13	9256370000000	5.42753	0.995571	0.997792	36575151643	22075041053
Fe-13toFe-8	3.87012	0.143	4.9676	0.999975	6.8e-09	TRUE	19.243	0.871657	0.217821	0.0748209	0.175468	5.81553e+13	9256370000000	5.42753	0.995571	0.997792	36575151643	22075041053
Fe-13toFe-5	3.87012	0.143	4.9676	0.999975	6.8e-09	TRUE	19.243	0.871657	0.217821	0.0748209	0.175468	5.81553e+13	9256370000000	5.42753	0.995571	0.997792	36575151643	22075041053
Fe-13toFe-6	3.87012	0.143	4.9676	0.999975	6.8e-09	TRUE	19.243	0.871657	0.217821	0.0748209	0.175468	5.81553e+13	9256370000000	5.42753	0.995571	0.997792	36575151643	22075041053
Fe-14toFe-7	3.87012	0.143	4.9676	0.999975	6.8e-09	TRUE	19.243	0.871657	0.217821	0.0748209	0.175468	5.81553e+13	9256370000000	5.42753	0.995571	0.997792	36575151643	22075041053
Fe-14toFe-8	3.87012	0.143	4.9676	0.999975	6.8e-09	TRUE	19.243	0.871657	0.217821	0.0748209	0.175468	5.81553e+13	9256370000000	5.42753	0.995571	0.997792	36575151643	22075041053
Fe-14toFe-5	3.87012	0.143	4.9676	0.999975	6.8e-09	TRUE	19.243	0.871657	0.217821	0.0748209	0.175468	5.81553e+13	9256370000000	5.42753	0.995571	0.997792	36575151643	22075041053
Fe-14toFe-6	3.87012	0.143	4.9676	0.999975	6.8e-09	TRUE	19.243	0.871657	0.217821	0.0748209	0.175468	5.81553e+13	9256370000000	5.42753	0.995571	0.997792	36575151643	22075041053
Fe-15toFe-5	3.87012	0.143	4.9676	0.999975	6.8e-09	TRUE	19.243	0.871657	0.217821	0.0748209	0.175468	5.81553e+13	9256370000000	5.42753	0.995571	0.997792	36575151643	22075041053
Fe-15toFe-7	3.87012	0.143	4.9676	0.999975	6.8e-09	TRUE	19.243	0.871657	0.217821	0.0748209	0.175468	5.81553e+13	9256370000000	5.42753	0.995571	0.997792	36575151643	22075041053
Fe-15toFe-6	3.87012	0.143	4.9676	0.999975	6.8e-09	TRUE	19.243	0.871657	0.217821	0.0748209	0.175468	5.81553e+13	9256370000000	5.42753	0.995571	0.997792	36575151643	22075041053
Fe-15toFe-8	3.87012	0.143	4.9676	0.999975	6.8e-09	TRUE	19.243	0.871657	0.217821	0.0748209	0.175468	5.81553e+13	9256370000000	5.42753	0.995571	0.997792	36575151643	22075041053
Fe-16toFe-5	3.87012	0.143	4.9676	0.999975	6.8e-09	TRUE	19.243	0.871657	0.217821	0.0748209	0.175468	5.81553e+13	9256370000000	5.42753	0.995571	0.997792	36575151643	22075041053
Fe-16toFe-7	3.87012	0.143	4.9676	0.999975	6.8e-09	TRUE	19.243	0.871657	0.217821	0.0748209	0.175468	5.81553e+13	9256370000000	5.42753	0.995571	0.997792	36575151643	22075041053
Fe-16toFe-6	3.87012	0.143	4.9676	0.999975	6.8e-09	TRUE	19.243	0.871657	0.217821	0.0748209	0.175468	5.81553e+13	9256370000000	5.42753	0.995571	0.997792	36575151643	22075041053
Fe-16toFe-8	3.87012	0.143	4.9676	0.999975	6.8e-09	TRUE	19.243	0.871657	0.217821	0.0748209	0.175468	5.81553e+13	9256370000000	5.42753	0.995571	0.997792	36575151643	22075041053

## Sheet: Fe16(PO4)15SO4
path	hoping_distance(Å)	abatic_barrier_energy(eV)	DeltaQ2	fit_R_2	fit_diff_2_sum	root_T_or_F	Effective_Mass	reconfig_energy(eV)	diabati_active_energy(eV)	V_ab(eV)	A	Omega	v_eff(Hz)	pi_2_gamma	P_LZ	kappa_el	k_ET_adiabatic(Hz)	k_ET_diabatic(Hz)
Fe-1toFe-11	3.81978	0.116	4.2841	0.999996	1.00904e-09	TRUE	19.6079	0.913999	0.207192	0.0911922	0.213347	6.41304e+13	1.02067e+13	7.13653	0.999204	0.999602	1.14815e+11	4.83087e+10
Fe-1toFe-10	3.82684	0.103	4.35799	0.999996	1.15395e-09	TRUE	19.6488	0.902605	0.206383	0.103383	0.207115	63186860765681	1.00565e+13	9.36767	0.999915	0.999957	1.87113e+11	6.44652e+10
Fe-1toFe-12	3.81978	0.116	4.28714	0.999996	1.20508e-09	TRUE	19.6081	0.914501	0.206702	0.0907022	0.213313	6.41253e+13	1.02059e+13	7.05867	0.99914	0.99957	1.14802e+11	4.8692e+10
Fe-1toFe-9	3.82684	0.103	4.3943	0.999995	1.29209e-09	TRUE	19.6377	0.901193	0.204605	0.101605	0.205082	6.2876e+13	1.0007e+13	9.10011	0.999888	0.999944	1.8619e+11	6.67522e+10
Fe-2toFe-11	3.84003	0.125	4.31919	0.999946	1.31085e-08	TRUE	19.3947	0.856121	0.201316	0.0763163	0.198213	6.18141e+13	9.83801e+12	5.35783	0.995289	0.997639	7.79782e+10	4.38794e+10
Fe-2toFe-10	3.84304	0.103	4.38374	0.999901	1.90158e-08	TRUE	19.1807	0.775581	0.182154	0.0791538	0.176922	5.83999e+13	9.29463e+12	6.40954	0.998354	0.999176	1.72803e+11	1.04073e+11
Fe-2toFe-12	3.84003	0.125	4.32274	0.999941	1.41167e-08	TRUE	19.3949	0.857407	0.20136	0.0763596	0.198348	6.18351e+13	9.84136e+12	5.35806	0.99529	0.997639	7.80048e+10	4.38228e+10
Fe-2toFe-9	3.84304	0.103	4.39691	0.999902	1.82938e-08	TRUE	19.1436	0.765097	0.17873	0.0757302	0.174008	5.79169e+13	9.21777e+12	5.95639	0.997411	0.998704	1.71293e+11	1.09497e+11
Fe-3toFe-10	3.82743	0.127	4.41287	0.999999	1.94633e-10	TRUE	19.5421	0.919931	0.221321	0.0943215	0.208465	6.33925e+13	1.00892e+13	7.69864	0.999547	0.999773	7.41743e+10	2.98239e+10
Fe-3toFe-11	3.8276	0.128	4.45168	0.999996	8.0678e-10	TRUE	19.5334	0.897363	0.227007	0.0990069	0.201578	6.23366e+13	9.92118e+12	8.73399	0.999839	0.999919	7.01815e+10	2.67028e+10
Fe-3toFe-9	3.82743	0.127	4.44957	0.999996	1.09463e-09	TRUE	19.5389	0.924513	0.219635	0.0926348	0.207776	6.32876e+13	1.00725e+13	7.41962	0.999401	0.9997	7.40461e+10	3.06301e+10
Fe-3toFe-12	3.8276	0.128	4.45471	0.999996	8.16667e-10	TRUE	19.5348	0.898148	0.226906	0.0989061	0.201618	6.23427e+13	9.92214e+12	8.71154	0.999835	0.999918	7.01882e+10	2.67409e+10
Fe-4toFe-10	3.82863	0.207	4.74039	0.999998	7.53107e-10	TRUE	20.1028	1.08751	0.372129	0.165129	0.229413	6.65013e+13	1.0584e+13	20.6875	1	1	3.52536e+09	2.46151e+08
Fe-4toFe-11	3.85118	0.216	4.92247	0.999997	1.29209e-09	TRUE	20.9352	1.25675	0.432322	0.216322	0.255309	7.01542e+13	1.11654e+13	31.3063	1	1	2.62563e+09	3.82956e+07
Fe-4toFe-9	3.82863	0.207	4.74947	0.999999	4.78531e-10	TRUE	20.1005	1.08431	0.371174	0.164174	0.228301	6.63399e+13	1.05583e+13	20.529	1	1	3.5168e+09	2.52837e+08
Fe-4toFe-12	3.85118	0.216	4.92918	0.999995	2.12345e-09	TRUE	20.937	1.25634	0.432474	0.216474	0.254878	7.0095e+13	1.1156e+13	31.3818	1	1	2.62341e+09	3.81309e+07
Fe-5toFe-13	3.83291	0.114	4.31336	0.999985	3.88644e-09	TRUE	19.639	0.906026	0.210805	0.0968047	0.210051	6.36331e+13	1.01275e+13	8.14043	0.999708	0.999854	1.23119e+11	4.75465e+10
Fe-5toFe-14	3.83291	0.114	4.31435	0.999983	4.61582e-09	TRUE	19.6392	0.90521	0.210195	0.0961954	0.209814	6.35972e+13	1.01218e+13	8.04645	0.99968	0.99984	1.23047e+11	4.80912e+10
Fe-5toFe-16	3.81007	0.074	4.48533	0.999988	3.35904e-09	TRUE	19.6826	0.938073	0.17802	0.10402	0.209142	6.34953e+13	1.01056e+13	9.25721	0.999905	0.999952	5.77293e+11	1.91766e+11
Fe-5toFe-15	3.81007	0.074	4.47793	0.999991	2.71328e-09	TRUE	19.6843	0.938198	0.179015	0.105015	0.209516	6.35521e+13	1.01146e+13	9.42615	0.999919	0.99996	5.77813e+11	1.88059e+11
Fe-6toFe-14	3.80011	0.274	4.77977	0.999999	2.15254e-10	TRUE	19.4953	0.903955	0.297874	0.0238744	0.189121	6.03797e+13	9.60973e+12	0.522406	0.406908	0.578443	1.38667e+08	9.97654e+07
Fe-6toFe-13	3.80011	0.249	4.77833	0.999999	3.4209e-10	TRUE	19.4944	0.903045	0.297597	0.0485966	0.188988	6.03584e+13	9.60633e+12	2.16635	0.885405	0.93922	5.91983e+08	4.18035e+08
Fe-6toFe-15	3.98418	0.248	5.44318	0.999998	6.25989e-10	TRUE	19.4288	0.973697	0.268026	0.0200258	0.178884	5.87228e+13	9.34602e+12	0.364142	0.305208	0.467677	2.98096e+08	2.14581e+08
Fe-6toFe-16	3.98418	0.251	5.44774	0.999997	7.4887e-10	TRUE	19.4257	0.972285	0.266903	0.0159034	0.178475	5.86556e+13	9.33533e+12	0.230083	0.205532	0.340982	1.93306e+08	1.41437e+08
Fe-7toFe-16	3.766	0.081	4.26129	0.99999	2.32627e-09	TRUE	19.3999	0.873917	0.166464	0.0854643	0.205083	6.28761e+13	1.0007e+13	6.53818	0.998553	0.999276	4.35764e+11	2.09709e+11
Fe-7toFe-15	3.76599	0.183	4.25593	0.99999	2.50932e-09	TRUE	19.4014	0.872599	0.167076	-0.0159241	0.205031	6.28682e+13	1.00058e+13	0.227185	0.203227	0.337803	2.84872e+09	7.11556e+09
Fe-7toFe-13	3.80814	0.128	4.10522	0.999975	5.99379e-09	TRUE	19.5867	0.846014	0.216241	0.0882407	0.206082	6.30291e+13	1.00314e+13	7.0667	0.999147	0.999573	7.09367e+10	3.31302e+10
Fe-7toFe-14	3.80815	0.133	4.10621	0.999965	7.88192e-09	TRUE	19.5868	0.844193	0.215688	0.0826877	0.20559	6.29537e+13	1.00194e+13	6.2194	0.99801	0.999004	5.83589e+10	2.97526e+10
Fe-8toFe-15	3.88152	0.162	4.92589	0.999999	4.00565e-10	TRUE	19.9044	1.13817	0.313849	0.151849	0.231058	6.67393e+13	1.06219e+13	17.039	1	1	2.01707e+10	1.93889e+09
Fe-8toFe-16	3.88152	0.162	4.9302	0.999999	3.99153e-10	TRUE	19.9025	1.13738	0.313228	0.151228	0.230697	6.66871e+13	1.06136e+13	16.9191	1	1	2.0155e+10	1.97048e+09
Fe-8toFe-14	3.82749	0.185	4.21364	0.999995	9.58475e-10	TRUE	19.266	0.827213	0.297788	0.112788	0.196318	61517786584602	9.79086e+12	11.9627	0.999994	0.999997	7.63759e+09	2.33536e+09
Fe-8toFe-13	3.8275	0.185	4.21267	0.999996	8.4209e-10	TRUE	19.2654	0.826585	0.297861	0.112861	0.196214	6.15015e+13	9.78827e+12	11.9857	0.999994	0.999997	7.63557e+09	2.33271e+09
Fe-9toFe-1	3.82684	0.151	4.3943	0.999993	2.00311e-09	TRUE	19.6377	0.918989	0.251865	0.100865	0.209132	6.34938e+13	1.01054e+13	8.79437	0.999848	0.999924	2.9365e+10	1.04698e+10
Fe-9toFe-2	3.84304	0.14	4.39691	0.999992	1.69972e-09	TRUE	19.1436	0.807376	0.21553	0.0755302	0.183624	5.94956e+13	9.46903e+12	5.6147	0.996356	0.998175	4.20354e+10	2.55396e+10
Fe-9toFe-3	3.82743	0.139	4.44957	0.999978	5.38983e-09	TRUE	19.5389	0.877966	0.230685	0.0916848	0.197315	61673779473719	9.81569e+12	7.65356	0.999526	0.999763	4.53649e+10	2.00808e+10
Fe-9toFe-4	3.82863	0.018	4.74947	0.999997	1.15395e-09	TRUE	20.1005	1.05816	0.182174	0.164174	0.222796	6.55352e+13	1.04302e+13	21.0363	1	1	5.19886e+12	3.83001e+11
Fe-10toFe-1	3.82684	0.151	4.35799	0.999999	1.10734e-10	TRUE	19.6488	0.932329	0.253873	0.102873	0.213936	6.42188e+13	1.02207e+13	8.97976	0.999874	0.999937	2.97007e+10	1.00045e+10
Fe-10toFe-2	3.84304	0.14	4.38374	0.999999	5.0565e-11	TRUE	19.1807	0.825204	0.219184	0.0791838	0.188242	6.02392e+13	9.58736e+12	6.02867	0.997591	0.998794	4.25872e+10	2.4106e+10
Fe-10toFe-3	3.82743	0.139	4.41287	1	4.37853e-11	TRUE	19.5421	0.896014	0.232601	0.0936015	0.203046	6.2563e+13	9.95721e+12	7.78393	0.999584	0.999792	4.60204e+10	1.92368e+10
Fe-10toFe-4	3.82863	0.018	4.74039	1	1.58192e-11	TRUE	20.1028	1.06447	0.183359	0.165359	0.224553	6.57931e+13	1.04713e+13	21.1941	1	1	5.21932e+12	3.70046e+11
Fe-11toFe-3	3.8276	0.124	4.45168	0.999964	8.95508e-09	TRUE	19.5334	0.902166	0.222877	0.0988769	0.202657	6.25032e+13	9.94769e+12	8.6647	0.999827	0.999914	8.21441e+10	3.11629e+10
Fe-11toFe-4	3.85118	0.012	4.92247	0.999991	5.47345e-09	TRUE	20.9352	1.3344	0.228142	0.216142	0.271084	7.22891e+13	1.15052e+13	29.4354	1	1	7.23272e+12	9.98802e+10
Fe-11toFe-1	3.81978	0.148	4.2841	0.999964	8.70226e-09	TRUE	19.6079	0.871814	0.239272	0.0912722	0.2035	6.2633e+13	9.96835e+12	7.49497	0.999444	0.999722	3.25246e+10	1.43261e+10
Fe-11toFe-2	3.84003	0.147	4.31919	0.999988	2.57797e-09	TRUE	19.3947	0.840301	0.222936	0.0759363	0.194551	6.12403e+13	9.7467e+12	5.40446	0.995504	0.997747	3.29903e+10	1.90009e+10
Fe-12toFe-3	3.8276	0.124	4.45471	0.999954	1.1798e-08	TRUE	19.5348	0.900596	0.222786	0.0987861	0.202167	6.24276e+13	9.93566e+12	8.66679	0.999828	0.999914	8.20448e+10	3.12423e+10
Fe-12toFe-4	3.85118	0.012	4.92918	0.999993	4.38559e-09	TRUE	20.937	1.33663	0.228304	0.216304	0.271166	7.23001e+13	1.15069e+13	29.4505	1	1	7.23382e+12	9.93225e+10
Fe-12toFe-1	3.81978	0.148	4.28714	0.999946	1.2654e-08	TRUE	19.6081	0.867765	0.238792	0.0907922	0.202411	6.24652e+13	9.94165e+12	7.4536	0.999421	0.99971	3.24371e+10	1.44751e+10
Fe-12toFe-2	3.84003	0.147	4.32274	0.999986	3.14802e-09	TRUE	19.3949	0.839485	0.22299	0.0759896	0.194202	6.11854e+13	9.73796e+12	5.41954	0.995571	0.99778	3.29619e+10	1.89976e+10
Fe-13toFe-7	3.80814	0.128	4.10522	0.999993	1.54379e-09	TRUE	19.5867	0.903986	0.220991	0.0929907	0.220204	6.51529e+13	1.03694e+13	7.34469	0.999354	0.999677	7.33344e+10	2.96194e+10
Fe-13toFe-8	3.8275	0.023	4.21267	0.999992	1.54379e-09	TRUE	19.2654	0.848431	0.135551	0.112551	0.2014	6.23089e+13	9.91677e+12	11.613	0.999991	0.999995	4.07367e+12	1.22038e+12
Fe-13toFe-5	3.83291	0.142	4.31336	0.999995	1.08701e-09	TRUE	19.639	0.891965	0.239005	0.0970047	0.206791	6.31374e+13	1.00486e+13	8.30296	0.999752	0.999876	4.13579e+10	1.61647e+10
Fe-13toFe-6	3.80011	0.108	4.77833	0.999996	6.94068e-10	TRUE	19.4944	0.867514	0.157387	0.0493866	0.181552	5.91591e+13	9.41546e+12	2.32899	0.902606	0.94881	1.36994e+11	9.98527e+10
Fe-14toFe-7	3.80815	0.133	4.10621	0.999998	4.77684e-10	TRUE	19.5868	0.90135	0.220438	0.0874377	0.219509	6.505e+13	10353027135848	6.51347	0.998517	0.999258	6.03175e+10	2.67928e+10
Fe-14toFe-8	3.82749	0.023	4.21364	0.999995	8.35593e-10	TRUE	19.266	0.846704	0.135478	0.112478	0.200944	6.22383e+13	9.90554e+12	11.6231	0.999991	0.999996	4.06905e+12	1.22347e+12
Fe-14toFe-5	3.83291	0.142	4.31435	0.999998	3.94068e-10	TRUE	19.6392	0.888041	0.238395	0.0963954	0.205834	6.29912e+13	1.00254e+13	8.23616	0.999735	0.999868	4.12617e+10	1.6379e+10
Fe-14toFe-6	3.80011	0.134	4.77977	0.999995	1.09463e-09	TRUE	19.4953	0.868958	0.157664	0.0236644	0.181799	5.91993e+13	9.42187e+12	0.533927	0.413702	0.585275	3.09311e+10	2.26623e+10
Fe-15toFe-5	3.81007	0.2	4.47793	0.999999	2.15254e-10	TRUE	19.6843	0.95951	0.304335	0.104335	0.214276	6.42699e+13	1.02289e+13	9.09781	0.999888	0.999944	4.46633e+09	1.44042e+09
Fe-15toFe-7	3.76599	0.183	4.25593	0.999999	2.36158e-10	TRUE	19.4014	0.85022	0.268946	0.0859459	0.199773	6.20568e+13	9.87664e+12	6.7921	0.998877	0.999438	8.31957e+09	4.08179e+09
Fe-15toFe-6	3.98418	0.205	5.44318	0.999999	1.23446e-10	TRUE	19.4288	0.995512	0.224936	0.0199358	0.182892	5.9377e+13	9.45014e+12	0.352969	0.297401	0.458457	1.55915e+09	1.11365e+09
Fe-15toFe-8	3.88152	0.097	4.92589	0.999999	3.0678e-10	TRUE	19.9044	1.10264	0.248659	0.151659	0.223845	65689348221130	1.04548e+13	17.5441	1	1	2.4535e+11	2.44622e+10
Fe-16toFe-5	3.81007	0.2	4.48533	0.999993	2.00311e-09	TRUE	19.6826	0.952323	0.30333	0.10333	0.212319	6.39758e+13	1.01821e+13	8.99812	0.999876	0.999938	4.44587e+09	1.47435e+09
Fe-16toFe-7	3.766	0.183	4.26129	0.999994	1.25226e-09	TRUE	19.3999	0.844852	0.268324	0.0853243	0.198262	6.18217e+13	9.83923e+12	6.74097	0.998818	0.999409	8.28781e+09	4.13394e+09
Fe-16toFe-6	3.98418	0.208	5.44774	0.999998	7.53107e-10	TRUE	19.4257	0.987508	0.223803	0.0158034	0.181269	5.9113e+13	9.40812e+12	0.223696	0.200442	0.333947	1.00678e+09	7.34106e+08
Fe-16toFe-8	3.88152	0.097	4.9302	1	1.4548e-10	TRUE	19.9025	1.09827	0.248028	0.151028	0.222765	65530601289701	10429519119040	17.4753	1	1	2.44757e+11	2.49076e+10

## Sheet: Fe16(PO4)SeO4
path	hoping_distance(Å)	abatic_barrier_energy(eV)	DeltaQ2	fit_R_2	fit_diff_2_sum	root_T_or_F	Effective_Mass	reconfig_energy(eV)	diabati_active_energy(eV)	V_ab(eV)	A	Omega	v_eff(Hz)	pi_2_gamma	P_LZ	kappa_el	k_ET_adiabatic(Hz)	k_ET_diabatic
Fe-1toFe-11	3.82636	0.135	4.40689	0.999982	4.33983e-09	TRUE	19.5194	0.894633	0.200907	0.0659074	0.203008	6.25572e+13	9.95629e+12	3.86258	0.978986	0.989382	5.31571e+10	3.25243e+10
Fe-1toFe-12	3.82636	0.135	4.38533	0.999983	4.09548e-09	TRUE	19.5117	0.892718	0.200644	0.0656441	0.203569	6.26437e+13	9.97005e+12	3.83059	0.978303	0.989033	5.32118e+10	3.26302e+10
Fe-1toFe-10	3.83002	0.094	4.51406	0.999987	3.21186e-09	TRUE	19.5698	0.891714	0.197066	0.103066	0.197541	6.17092e+13	9.82132e+12	9.59126	0.999932	0.999966	2.58836e+11	9.24304e+10
Fe-1toFe-9	3.83002	0.094	4.51434	0.999986	3.54661e-09	TRUE	19.5724	0.891431	0.197426	0.103426	0.197467	61697542911831	9.81947e+12	9.6618	0.999936	0.999968	2.58788e+11	9.1804e+10
Fe-2toFe-12	3.83581	0.124	4.47645	0.999994	1.4565e-09	TRUE	19.3789	0.88167	0.209008	0.0850082	0.196957	6.16179e+13	9.8068e+12	6.57158	0.9986	0.9993	8.09309e+10	3.98423e+10
Fe-2toFe-11	3.83581	0.124	4.50125	0.999995	1.36836e-09	TRUE	19.3903	0.883867	0.209311	0.0853106	0.19636	6.15244e+13	9.79192e+12	6.62023	0.998667	0.999333	8.08109e+10	3.96103e+10
Fe-2toFe-9	3.85384	0.129	4.52049	0.999985	3.1065e-09	TRUE	19.2417	0.813151	0.188323	0.0593229	0.179881	5.88863e+13	9.37204e+12	3.48702	0.969408	0.984466	6.27958e+10	4.4971e+10
Fe-2toFe-10	3.85384	0.129	4.51911	0.999988	2.19379e-09	TRUE	19.2379	0.81268	0.1877	0.0586996	0.179832	5.88782e+13	9370752743679	3.41559	0.967143	0.983297	6.27126e+10	4.51185e+10
Fe-3toFe-9	3.83982	0.133	4.70844	0.999995	1.4565e-09	TRUE	19.5197	0.926114	0.2242	0.0911998	0.196693	6.15765e+13	9.8002e+12	7.38498	0.999379	0.99969	5.71214e+10	2.48612e+10
Fe-3toFe-10	3.83982	0.133	4.70858	0.999995	1.4565e-09	TRUE	19.5202	0.926114	0.223588	0.0905879	0.196687	6.15756e+13	9.80005e+12	7.28632	0.999315	0.999657	5.71187e+10	2.51163e+10
Fe-3toFe-12	3.83274	0.148	4.61996	0.999985	3.54661e-09	TRUE	19.4689	0.869209	0.228136	0.0801358	0.188142	6.02232e+13	9.58482e+12	6.01777	0.997565	0.998781	3.12438e+10	1.70152e+10
Fe-3toFe-11	3.83274	0.148	4.64509	0.999984	3.82175e-09	TRUE	19.4869	0.871908	0.22838	0.0803796	0.187705	6.01532e+13	9.57369e+12	6.0521	0.997647	0.998822	3.12088e+10	1.69319e+10
Fe-4toFe-10	3.81115	0.283	4.62059	0.999999	3.03955e-10	TRUE	19.4022	0.884432	0.301095	0.0180954	0.191411	6.07441e+13	9.66773e+12	0.301583	0.260354	0.413144	7.03453e+07	5.11542e+07
Fe-4toFe-9	3.81115	0.283	4.62816	1	1.0226e-10	TRUE	19.4131	0.887445	0.302222	0.0192217	0.191749	60797727720812	9.67626e+12	0.339417	0.287814	0.446981	7.61739e+07	5.51658e+07
Fe-4toFe-11	3.8649	0.198	4.61302	0.999977	5.48644e-09	TRUE	19.3579	0.849529	0.310449	0.112449	0.184159	5.95823e+13	9.48282e+12	12.1147	0.999995	0.999997	4.47386e+09	1.40368e+09
Fe-4toFe-12	3.8649	0.198	4.57269	0.999977	4.98559e-09	TRUE	19.3293	0.841149	0.309422	0.111422	0.183951	5.95486e+13	9.47746e+12	11.9604	0.999994	0.999997	4.47133e+09	1.44112e+09
Fe-5toFe-13	3.82405	0.127	4.33791	0.999959	1.06946e-08	TRUE	19.9574	0.89118	0.214208	0.0872079	0.20544	6.29308e+13	1.00157e+13	6.73556	0.998812	0.999406	7.3607e+10	3.41078e+10
Fe-5toFe-14	3.82405	0.127	4.38069	0.999958	1.08633e-08	TRUE	20.0029	0.899309	0.215681	0.0886811	0.20529	62907796058519	1.00121e+13	6.93605	0.999028	0.999514	7.3588e+10	3.31652e+10
Fe-5toFe-16	3.79898	0.092	4.46078	0.99998	5.38983e-09	TRUE	19.9964	0.922411	0.184067	0.0920669	0.206782	6.31361e+13	1.00484e+13	7.35488	0.999361	0.99968	2.8604e+11	1.19899e+11
Fe-5toFe-15	3.79898	0.092	4.42953	0.99998	5.29802e-09	TRUE	19.9971	0.921626	0.183429	0.0914292	0.208064	6.33315e+13	1.00795e+13	7.23406	0.999278	0.999639	2.86913e+11	1.21248e+11
Fe-6toFe-13	3.79503	0.205	4.14429	0.999986	3.36667e-09	TRUE	19.5901	0.837037	0.27588	0.0708798	0.201974	62397671574139	9.9309e+12	4.63034	0.990249	0.9951	3.55637e+09	2.13971e+09
Fe-6toFe-14	3.79503	0.205	4.18566	0.999985	3.56328e-09	TRUE	19.629	0.843754	0.27704	0.0720398	0.201582	6.23371e+13	9.92126e+12	4.7687	0.991509	0.995736	3.55519e+09	2.1049e+09
Fe-6toFe-15	4.00786	0.177	4.82942	0.999982	6.04972e-09	TRUE	19.9577	1.0167	0.274534	0.0975338	0.210522	6.37044e+13	1.01389e+13	7.79208	0.999587	0.999793	1.07753e+10	3.87265e+09
Fe-6toFe-16	4.00786	0.177	4.85606	0.999982	6.04972e-09	TRUE	19.9623	1.0167	0.274709	0.0977092	0.209367	6.35294e+13	1.0111e+13	7.84167	0.999607	0.999803	1.07458e+10	3.86031e+09
Fe-7toFe-16	3.766	0.107	4.32925	0.999998	5.83051e-10	TRUE	19.6465	0.864783	0.184901	0.0779006	0.199753	6.20538e+13	9.87616e+12	5.5331	0.996046	0.998019	1.57111e+11	8.58406e+10
Fe-7toFe-15	3.766	0.107	4.29021	0.999998	4.92938e-10	TRUE	19.6247	0.859102	0.183287	0.0762871	0.200247	6.21304e+13	9.88836e+12	5.31722	0.995094	0.997541	1.57229e+11	8.79124e+10
Fe-7toFe-14	3.81382	0.15	4.39604	0.999998	4.36158e-10	TRUE	20.0303	0.912743	0.248774	0.0987744	0.207628	6.32651e+13	10068955737846	8.49295	0.999795	0.999898	3.04124e+10	1.1354e+10
Fe-7toFe-13	3.81382	0.15	4.36215	0.999999	2.60734e-10	TRUE	19.9922	0.90656	0.247509	0.0975094	0.207824	6.32949e+13	1.00737e+13	8.30108	0.999752	0.999876	3.04261e+10	1.16595e+10
Fe-8toFe-16	3.9325	0.329	5.07535	0.999999	7.00565e-10	TRUE	21.5327	1.39372	0.410424	0.081424	0.274606	7.27572e+13	11579670845029	4.06115	0.982771	0.991311	3.41153e+07	1.20187e+07
Fe-8toFe-15	3.9325	0.329	5.0485	0.999999	5.94633e-10	TRUE	21.5088	1.38289	0.407712	0.0787116	0.273922	7.26665e+13	1.15652e+13	3.81467	0.977955	0.988855	3.39884e+07	1.25224e+07
Fe-8toFe-13	3.81591	0.227	4.73828	0.999995	2.80226e-09	TRUE	21.9659	1.29856	0.447728	0.220728	0.274056	72684363835563	1.15681e+13	30.9495	1	1	1.77758e+09	2.16142e+07
Fe-8toFe-14	3.81591	0.227	4.78031	0.999992	4.04209e-09	TRUE	21.9662	1.30304	0.448322	0.221322	0.272586	7.24891e+13	1.1537e+13	31.1462	1	1	1.7728e+09	2.12008e+07
Fe-9toFe-1	3.83002	0.154	4.51434	0.999997	8.62429e-10	TRUE	19.5724	0.919429	0.257676	0.103676	0.203669	6.26589e+13	9.97248e+12	9.41293	0.999918	0.999959	2.58047e+10	8.83259e+09
Fe-9toFe-2	3.85384	0.167	4.52049	0.999998	4.18362e-10	TRUE	19.2417	0.841274	0.226393	0.0593929	0.186103	5.98959e+13	9.53273e+12	3.37841	0.965898	0.982653	1.46602e+10	1.01631e+10
Fe-9toFe-3	3.83982	0.142	4.70844	0.999997	6.5678e-10	TRUE	19.5197	0.902919	0.23299	0.0909898	0.191766	6.08005e+13	9.6767e+12	7.53985	0.999469	0.999734	3.98214e+10	1.78387e+10
Fe-9toFe-4	3.81115	0.128	4.62816	0.999997	3.62429e-10	TRUE	19.4131	0.852762	0.147882	0.0198817	0.184255	5.95978e+13	9.48529e+12	0.377894	0.314697	0.478737	3.21249e+10	2.35748e+10
Fe-10toFe-1	3.83002	0.154	4.51406	0.999993	1.80932e-09	TRUE	19.5698	0.91629	0.257286	0.103286	0.202986	6.25538e+13	9.95574e+12	9.3739	0.999915	0.999958	2.57614e+10	8.9148e+09
Fe-10toFe-2	3.85384	0.167	4.51911	0.999995	1.20508e-09	TRUE	19.2379	0.836723	0.22574	0.0587396	0.185152	5.97428e+13	9.50836e+12	3.32196	0.963918	0.981628	1.46075e+10	1.02228e+10
Fe-10toFe-3	3.83982	0.142	4.70858	0.999991	2.41412e-09	TRUE	19.5202	0.898054	0.232348	0.0903479	0.190727	6.06355e+13	9.65045e+12	7.47423	0.999432	0.999716	3.97127e+10	1.80788e+10
Fe-10toFe-4	3.81115	0.128	4.62059	0.999999	1.48023e-10	TRUE	19.4022	0.8457	0.146725	0.0187254	0.183029	5.93992e+13	9.45367e+12	0.337739	0.286618	0.445537	2.97975e+10	2.19601e+10
Fe-11toFe-3	3.83274	0.133	4.64509	0.999978	5.82599e-09	TRUE	19.4869	0.896673	0.21372	0.0807196	0.193037	6.10015e+13	9.70869e+12	5.93484	0.997354	0.998675	5.65306e+10	2.96871e+10
Fe-11toFe-4	3.8649	0.02	4.61302	0.999957	1.02667e-08	TRUE	19.3579	0.848148	0.132659	0.112659	0.18386	5.95339e+13	9.47511e+12	12.1797	0.999995	0.999997	4.37117e+12	1.36768e+12
Fe-11toFe-1	3.82636	0.172	4.40689	0.999965	8.40311e-09	TRUE	19.5194	0.858788	0.237707	0.0657074	0.194874	6.12912e+13	9.75479e+12	3.99942	0.981674	0.990752	1.24655e+10	7.94759e+09
Fe-11toFe-2	3.83581	0.138	4.50125	0.999983	3.82175e-09	TRUE	19.3903	0.849686	0.223931	0.0859306	0.188767	6.03231e+13	9.60072e+12	6.987	0.999076	0.999538	4.6111e+10	2.3284e+10
Fe-12toFe-3	3.83274	0.133	4.61996	0.99999	2.73701e-09	TRUE	19.4689	0.89752	0.213466	0.0804658	0.19427	6.11961e+13	9.73967e+12	5.87604	0.997194	0.998595	5.67064e+10	2.97777e+10
Fe-12toFe-4	3.8649	0.02	4.57269	0.999989	2.74746e-09	TRUE	19.3293	0.850094	0.131622	0.111622	0.185907	5.98644e+13	9.52772e+12	11.8771	0.999993	0.999997	4.39544e+12	1.39595e+12
Fe-12toFe-1	3.82636	0.172	4.38533	0.999976	5.70904e-09	TRUE	19.5117	0.858443	0.237434	0.0654341	0.195754	6.14293e+13	9.77678e+12	3.95808	0.9809	0.990358	1.24886e+10	7.96698e+09
Fe-12toFe-2	3.83581	0.138	4.47645	0.99999	2.12542e-09	TRUE	19.3789	0.849341	0.223618	0.0856182	0.189735	6.04777e+13	9.62532e+12	6.91998	0.999012	0.999506	4.62277e+10	2.34007e+10
Fe-13toFe-7	3.81382	0.116	4.36215	0.999994	1.76582e-09	TRUE	19.9922	0.936692	0.213559	0.0975594	0.214732	6.43382e+13	1.02397e+13	8.04229	0.999678	0.999839	1.15214e+11	4.26932e+10
Fe-13toFe-8	3.81591	0.016	4.73828	0.999998	1.14972e-09	TRUE	21.9659	1.39448	0.237638	0.221638	0.2943	7.5321e+13	1.19877e+13	29.0587	1	1	6.45577e+12	7.11533e+10
Fe-13toFe-5	3.82405	0.139	4.33791	0.999991	2.14548e-09	TRUE	19.9574	0.872348	0.226658	0.0876579	0.201098	6.22623e+13	9.90936e+12	6.95217	0.999043	0.999521	4.57868e+10	2.15185e+10
Fe-13toFe-6	3.79503	0.074	4.14429	0.999996	7.55085e-10	TRUE	19.5901	0.797834	0.14472	0.0707198	0.192514	6.09189e+13	9.69555e+12	4.83595	0.992061	0.996015	5.51687e+11	3.48497e+11
Fe-14toFe-7	3.81382	0.116	4.39604	0.999994	1.69972e-09	TRUE	20.0303	0.940709	0.214874	0.0988744	0.21399	6.4227e+13	1.0222e+13	8.25716	0.999741	0.99987	1.15018e+11	4.1588e+10
Fe-14toFe-8	3.81591	0.016	4.78031	0.999996	2.40226e-09	TRUE	21.9662	1.39404	0.238282	0.222282	0.291621	7.49773e+13	1.1933e+13	29.3663	1	1	6.42631e+12	6.98185e+10
Fe-14toFe-5	3.82405	0.139	4.38069	0.999988	2.80226e-09	TRUE	20.0029	0.876334	0.228181	0.0891811	0.200045	6.2099e+13	9.88337e+12	7.19838	0.999252	0.999626	4.56715e+10	2.09505e+10
Fe-14toFe-6	3.79503	0.074	4.18566	0.999994	1.25226e-09	TRUE	19.629	0.800408	0.14593	0.0719298	0.191226	6.07148e+13	9.66306e+12	5.0116	0.99334	0.996659	5.50194e+11	3.43485e+11
Fe-15toFe-5	3.79898	0.197	4.42953	0.999978	6.04972e-09	TRUE	19.9971	0.93892	0.288039	0.0910392	0.211968	63922902312662	1.01736e+13	7.04036	0.999124	0.999562	4.98692e+09	2.08236e+09
Fe-15toFe-7	3.766	0.165	4.29021	0.999972	5.96328e-09	TRUE	19.6247	0.834024	0.241497	0.0764971	0.194402	6.12168e+13	9.74296e+12	5.5073	0.995943	0.997967	1.6441e+10	9.44031e+09
Fe-15toFe-6	4.00786	0.138	4.82942	0.99999	3.47599e-09	TRUE	19.9577	1.02075	0.235534	0.0975338	0.21136	6.38311e+13	1.0159e+13	7.76117	0.999574	0.999787	4.88048e+10	1.74709e+10
Fe-15toFe-8	3.9325	0.211	5.0485	0.999998	1.14915e-09	TRUE	21.5088	1.38738	0.289782	0.0787816	0.274811	7.27843e+13	1.1584e+13	3.80909	0.977832	0.988792	3.26828e+09	1.19921e+09
Fe-16toFe-5	3.79898	0.197	4.46078	0.999991	2.41412e-09	TRUE	19.9964	0.942498	0.288527	0.0915269	0.211286	6.38199e+13	10157245012098	7.11393	0.999186	0.999593	4.97903e+09	2.06147e+09
Fe-16toFe-7	3.766	0.165	4.32925	0.99998	4.46412e-09	TRUE	19.6465	0.840647	0.242961	0.0779606	0.194178	6.11816e+13	9.73736e+12	5.70074	0.996657	0.998325	1.64375e+10	9.22876e+09
Fe-16toFe-6	4.00786	0.138	4.85606	0.999991	2.87542e-09	TRUE	19.9623	1.02156	0.235559	0.0975592	0.210369	6.36812e+13	1.01352e+13	7.78039	0.999582	0.999791	4.86903e+10	1.74559e+10
Fe-16toFe-8	3.9325	0.211	5.07535	0.999998	1.09463e-09	TRUE	21.5327	1.39771	0.292344	0.081344	0.275392	7.28612e+13	1.15962e+13	4.04161	0.982431	0.991138	3.27949e+09	1.15356e+09

## Sheet: Fe16(PO4)SiO4
path	hoping_distance(Å)	abatic_barrier_energy(eV)	DeltaQ2	fit_R_2	fit_diff_2_sum	root_T_or_F	Effective_Mass	reconfig_energy(eV)	diabati_active_energy(eV)	V_ab(eV)	A	Omega	v_eff(Hz)	pi_2_gamma	P_LZ	kappa_el	k_ET_adiabatic(Hz)	k_ET_diabatic
Fe-1toFe-11	3.9209	0.158	7.08347	0.999917	2.84873e-08	TRUE	19.2299	1.01591	0.254279	0.0962793	0.14342	5.25807e+13	8.36848e+12	9.2028	0.999899	0.99995	1.85499e+10	8.26403e+09
Fe-1toFe-12	3.9209	0.158	7.02272	0.999943	1.95107e-08	TRUE	19.201	0.997301	0.250098	0.0920981	0.142011	5.23216e+13	8.32725e+12	8.54113	0.999805	0.999902	1.84576e+10	8.97189e+09
Fe-1toFe-10	3.91619	0.162	6.9407	0.99989	3.49017e-08	TRUE	19.2369	0.954237	0.263686	0.101686	0.137484	5.1481e+13	8.19346e+12	10.8183	0.99998	0.99999	1.5559e+10	6.61028e+09
Fe-1toFe-9	3.91619	0.162	6.98239	0.999874	3.95785e-08	TRUE	19.2551	0.965788	0.265067	0.103067	0.138318	5.16369e+13	8.21826e+12	11.014	0.999984	0.999992	1.56062e+10	6.39924e+09
Fe-2toFe-11	3.90566	0.163	7.28523	0.999992	3.38305e-09	TRUE	19.5103	1.14256	0.291258	0.128258	0.156833	5.49844e+13	8.75103e+12	14.7265	1	1	1.59875e+10	3.30801e+09
Fe-2toFe-12	3.90566	0.163	7.22733	0.999987	5.12175e-09	TRUE	19.4959	1.13487	0.289245	0.126245	0.157025	5.50181e+13	8.7564e+12	14.3073	0.999999	1	1.59973e+10	3.47627e+09
Fe-2toFe-9	3.89943	0.177	7.07894	0.999986	5.32034e-09	TRUE	19.5359	1.08211	0.300589	0.123589	0.152863	5.42841e+13	8.63958e+12	14.2318	0.999999	1	9.18382e+09	2.19993e+09
Fe-2toFe-10	3.89943	0.177	7.03995	0.999983	6.04915e-09	TRUE	19.5295	1.07627	0.300559	0.123559	0.152881	5.42872e+13	8.64007e+12	14.2626	0.999999	1	9.18434e+09	2.20738e+09
Fe-3toFe-9	3.91776	0.153	7.18022	0.999955	1.62517e-08	TRUE	19.3791	1.09576	0.262884	0.109884	0.152608	5.42388e+13	8.63238e+12	11.1894	0.999986	0.999993	2.32188e+10	7.43045e+09
Fe-3toFe-10	3.91776	0.153	7.13878	0.99996	1.55641e-08	TRUE	19.3717	1.08509	0.262002	0.109002	0.152	5.41305e+13	8.61514e+12	11.0868	0.999985	0.999992	2.31725e+10	7.60239e+09
Fe-3toFe-12	3.92007	0.177	6.78935	0.999795	4.97523e-08	TRUE	19.182	0.910703	0.225713	0.0487129	0.134137	5.08505e+13	8.09311e+12	2.57284	0.923681	0.960327	8.26162e+09	6.74603e+09
Fe-3toFe-11	3.92008	0.177	6.81889	0.999907	2.7298e-08	TRUE	19.2266	0.937633	0.2334	0.0563996	0.137505	5.1485e+13	8.19409e+12	3.35709	0.965164	0.982273	8.55586e+09	6.61993e+09
Fe-4toFe-9	3.9052	0.072	6.15635	0.999965	1.09898e-08	TRUE	19.4316	0.966855	0.122928	0.0509277	0.15705	55022453957233	8.7571e+12	2.5223	0.919725	0.958184	5.1792e+11	3.8141e+11
Fe-4toFe-10	3.9052	0.072	6.12409	0.999955	1.40551e-08	TRUE	19.4365	0.964501	0.125163	0.0531627	0.157493	5.51e+13	8.76944e+12	2.74802	0.935945	0.966913	5.23374e+11	3.81663e+11
Fe-4toFe-11	3.89523	0.067	6.4772	0.999926	2.30107e-08	TRUE	19.5896	0.98619	0.138476	0.0714756	0.152255	5.41761e+13	8.62239e+12	4.99616	0.993236	0.996607	6.43577e+11	4.07668e+11
Fe-4toFe-12	3.89523	0.067	6.4455	0.999936	1.97751e-08	TRUE	19.5778	0.980917	0.136669	0.0696687	0.152186	5.41637e+13	8.62043e+12	4.76057	0.991439	0.995701	6.42847e+11	4.16471e+11
Fe-5toFe-13	3.91442	0.153	7.32707	0.999762	9.79263e-08	TRUE	19.4572	1.08503	0.26715	0.11415	0.148085	5.34289e+13	8.50347e+12	12.3187	0.999996	0.999998	2.28722e+10	6.83231e+09
Fe-5toFe-14	3.91442	0.153	7.37794	0.999665	1.30977e-07	TRUE	19.4601	1.07806	0.267729	0.114729	0.146119	5.30732e+13	8.44686e+12	12.5677	0.999997	0.999998	2.272e+10	6.77078e+09
Fe-5toFe-16	3.92687	0.195	6.97437	0.998428	2.87302e-07	TRUE	19.0538	0.760703	0.258002	0.0630019	0.109071	4.58539e+13	7.29787e+12	5.22194	0.994603	0.997294	3.85624e+09	3.54093e+09
Fe-5toFe-15	3.92687	0.195	6.98386	0.998227	3.16961e-07	TRUE	19.0643	0.760107	0.257778	0.0627781	0.108838	45804743737462	7.29005e+12	5.19252	0.994442	0.997213	3.85179e+09	3.54777e+09
Fe-6toFe-16	3.78497	0.16	5.68924	0.999993	1.6339e-09	TRUE	20.111	1.14557	0.286288	0.126288	0.201358	6.23025e+13	9.91575e+12	12.5839	0.999997	0.999998	2.03443e+10	3.88189e+09
Fe-6toFe-15	3.78497	0.16	5.69362	0.999995	1.20226e-09	TRUE	20.1255	1.15041	0.287794	0.127794	0.202052	6.24098e+13	9.93283e+12	12.8365	0.999997	0.999999	2.03794e+10	3.74223e+09
Fe-6toFe-13	3.93078	0.125	6.84967	0.999934	2.34314e-08	TRUE	19.6132	1.16356	0.218166	0.0931659	0.169871	5.72243e+13	9.10753e+12	7.39856	0.999388	0.999694	7.23369e+10	2.92316e+10
Fe-6toFe-14	3.93078	0.125	6.89753	0.999925	2.45997e-08	TRUE	19.6177	1.1704	0.222331	0.0973311	0.169684	5.71928e+13	9.10252e+12	8.0557	0.999683	0.999841	7.23078e+10	2.70767e+10
Fe-7toFe-16	3.98116	0.203	7.70699	0.999692	1.10722e-07	TRUE	19.3705	1.08365	0.319036	0.116036	0.140606	5.20622e+13	8.28595e+12	13.0716	0.999998	0.999999	3.22175e+09	9.49355e+08
Fe-7toFe-15	3.98116	0.202	7.70707	0.999698	1.08999e-07	TRUE	19.3742	1.07772	0.318631	0.116631	0.139835	5.19192e+13	8.2632e+12	13.2787	0.999998	0.999999	3.33962e+09	9.76945e+08
Fe-7toFe-14	3.93062	0.153	7.84926	0.99996	1.5876e-08	TRUE	19.3032	1.08001	0.275133	0.122133	0.137593	5.15015e+13	8.19672e+12	14.6636	1	1	2.20472e+10	5.75682e+09
Fe-7toFe-13	3.93062	0.153	7.8276	0.999976	9.09915e-09	TRUE	19.3128	1.09595	0.276339	0.123339	0.140011	5.1952e+13	8.26842e+12	14.7167	1	1	2.224e+10	5.56257e+09
Fe-8toFe-16	3.88288	0.135	6.87171	0.99997	6.97345e-09	TRUE	19.6396	1.13227	0.218682	0.0836823	0.164772	5.63589e+13	8.9698e+12	6.14383	0.997853	0.998926	4.83522e+10	2.34342e+10
Fe-8toFe-15	3.88288	0.135	6.87657	0.999979	5.50311e-09	TRUE	19.6507	1.13751	0.217548	0.0825477	0.165418	5.64693e+13	8.98736e+12	5.9529	0.997402	0.998699	4.84358e+10	2.37712e+10
Fe-8toFe-13	3.90603	0.064	7.93894	0.999993	4.07514e-09	TRUE	20.0723	1.30314	0.231833	0.167833	0.164145	5.62516e+13	8.95273e+12	23.0799	1	1	7.53013e+11	5.28315e+10
Fe-8toFe-14	3.90603	0.064	7.98414	0.999991	4.68305e-09	TRUE	20.0781	1.30923	0.236644	0.172644	0.163978	5.6223e+13	8.94818e+12	24.3775	1	1	7.52631e+11	4.63031e+10
Fe-9toFe-2	3.89943	0.134	7.07894	0.999969	1.2959e-08	TRUE	19.5359	1.14711	0.256589	0.122589	0.162046	5.58907e+13	8.89529e+12	13.209	0.999998	0.999999	4.98952e+10	1.15306e+10
Fe-9toFe-1	3.91619	0.134	6.98239	0.999997	6.5226e-10	TRUE	19.2551	1.04404	0.236667	0.102667	0.149524	5.36879e+13	8.5447e+12	10.1096	0.999959	0.99998	4.79278e+10	1.83203e+10
Fe-9toFe-4	3.9052	0.344	6.15635	0.999913	2.29234e-08	TRUE	19.4316	0.954771	0.395278	0.0512777	0.155087	5.46775e+13	8.7022e+12	2.58945	0.924939	0.961006	1.39126e+07	1.03465e+07
Fe-9toFe-3	3.91776	0.161	7.18022	0.999976	5.25904e-09	TRUE	19.3791	1.0397	0.270634	0.109634	0.144801	5.28332e+13	8.40867e+12	11.7391	0.999992	0.999996	1.65976e+10	5.6266e+09
Fe-10toFe-2	3.89943	0.134	7.03995	0.999983	7.48701e-09	TRUE	19.5295	1.15493	0.256809	0.122809	0.164053	5.62359e+13	8.95022e+12	13.1304	0.999998	0.999999	5.02033e+10	1.14351e+10
Fe-10toFe-1	3.91619	0.134	6.9407	0.999994	2.08136e-09	TRUE	19.2369	1.04689	0.235536	0.101536	0.150834	5.39225e+13	8.58204e+12	9.83174	0.999946	0.999973	4.81369e+10	1.86945e+10
Fe-10toFe-4	3.9052	0.344	6.12409	0.999973	6.90226e-09	TRUE	19.4365	0.971814	0.397763	0.0537627	0.158687	5.53085e+13	8.80262e+12	2.78924	0.938532	0.968292	1.41799e+07	1.02402e+07
Fe-10toFe-3	3.91776	0.161	7.13878	0.999991	2.05056e-09	TRUE	19.3717	1.04372	0.270002	0.109002	0.146205	5.30886e+13	8.44932e+12	11.5262	0.99999	0.999995	1.66778e+10	5.68849e+09
Fe-11toFe-4	3.89523	0.357	6.4772	0.999993	2.34887e-09	TRUE	19.5896	1.09451	0.427926	0.0709256	0.168978	57073762848234	9.08357e+12	4.4327	0.988118	0.994023	9.08484e+06	5.22904e+06
Fe-11toFe-3	3.92008	0.202	6.81889	0.999891	3.72734e-08	TRUE	19.2266	1.02856	0.25825	0.0562496	0.15084	53923659387465	8.58222e+12	3.04406	0.952359	0.975598	3.38392e+09	2.40425e+09
Fe-11toFe-2	3.90566	0.136	7.28523	0.999944	2.07754e-08	TRUE	19.5103	1.07844	0.264358	0.128358	0.148031	5.34191e+13	8.50192e+12	15.6265	1	1	4.41385e+10	9.65352e+09
Fe-11toFe-1	3.9209	0.147	7.08347	0.999989	1.54407e-09	TRUE	19.2299	0.97307	0.242979	0.0959793	0.137372	5.146e+13	8.19012e+12	9.54821	0.999929	0.999964	2.77833e+10	1.29918e+10
Fe-12toFe-4	3.89523	0.357	6.4455	0.999975	7.76073e-09	TRUE	19.5778	1.08603	0.426589	0.0695887	0.168495	5.6992e+13	9.07056e+12	4.28993	0.986294	0.9931	9.0634e+06	5.32157e+06
Fe-12toFe-3	3.92007	0.202	6.78935	0.999991	1.22345e-09	TRUE	19.182	0.995512	0.251033	0.0490329	0.146628	5.31655e+13	8.46155e+12	2.38468	0.907882	0.951717	3.25467e+09	2.45495e+09
Fe-12toFe-2	3.90566	0.136	7.22733	0.999933	2.31271e-08	TRUE	19.4959	1.07194	0.262815	0.126815	0.148318	5.34709e+13	8.51015e+12	15.2843	1	1	4.41812e+10	1.00327e+10
Fe-12toFe-1	3.9209	0.147	7.02272	0.999989	3.52345e-09	TRUE	19.201	0.960044	0.239268	0.0922681	0.136705	5.1335e+13	8.17022e+12	8.90538	0.999864	0.999932	2.77149e+10	1.39537e+10
Fe-13toFe-8	3.90603	0.281	7.93894	0.999718	1.52304e-07	TRUE	20.0723	1.34149	0.448503	0.167503	0.168977	5.70735e+13	9.08352e+12	22.3319	1	1	1.72847e+08	1.18847e+07
Fe-13toFe-7	3.93062	0.156	7.8276	0.999994	2.33136e-09	TRUE	19.3128	1.12533	0.278929	0.122929	0.143764	5.26437e+13	8.37851e+12	14.2373	0.999999	1	2.0067e+10	4.9332e+09
Fe-13toFe-6	3.93078	0.249	6.84967	0.999687	1.05452e-07	TRUE	19.6132	1.06243	0.341546	0.0925459	0.155107	5.4681e+13	8.70275e+12	7.99533	0.999663	0.999831	5.70909e+08	2.55332e+08
Fe-13toFe-5	3.91442	0.157	7.32707	0.999996	7.10734e-10	TRUE	19.4572	1.06767	0.27099	0.11399	0.145716	5.29998e+13	8.43518e+12	12.4839	0.999996	0.999998	1.94361e+10	5.92028e+09
Fe-14toFe-8	3.90603	0.281	7.98414	0.999983	1.12031e-08	TRUE	20.0781	1.3736	0.453914	0.172914	0.172041	5.75887e+13	9.16553e+12	23.3078	1	1	1.74408e+08	1.01524e+07
Fe-14toFe-7	3.93062	0.156	7.84926	0.999981	6.30169e-09	TRUE	19.3032	1.13465	0.278323	0.122323	0.144555	5.27883e+13	8.40152e+12	14.0008	0.999999	1	2.01221e+10	4.97995e+09
Fe-14toFe-6	3.93078	0.249	6.89753	0.999869	5.17234e-08	TRUE	19.6177	1.0881	0.346311	0.0973111	0.157753	55145413176059	8.77667e+12	8.66142	0.999827	0.999913	5.75806e+08	2.31994e+08
Fe-14toFe-5	3.91442	0.157	7.37794	0.99993	2.76667e-08	TRUE	19.4601	1.08148	0.272169	0.115169	0.146583	5.31573e+13	8.46025e+12	12.6242	0.999997	0.999998	1.94939e+10	5.73702e+09
Fe-15toFe-6	3.78497	0.186	5.69362	0.999963	1.46251e-08	TRUE	20.1255	1.25797	0.314284	0.128284	0.220944	65262296643285	1.03868e+13	11.8291	0.999993	0.999996	7.79504e+09	1.29429e+09
Fe-15toFe-5	3.92687	0.102	6.98386	0.999721	6.88989e-08	TRUE	19.0643	0.944382	0.164728	0.0627281	0.135223	5.1056e+13	8.12582e+12	4.17266	0.984589	0.992235	1.5594e+11	1.16225e+11
Fe-15toFe-8	3.88288	0.255	6.87657	0.999975	6.47034e-09	TRUE	19.6507	1.06544	0.337328	0.0823277	0.154938	5.46512e+13	8.69801e+12	6.32172	0.998203	0.999101	4.52083e+08	2.37536e+08
Fe-15toFe-7	3.98116	0.108	7.70707	0.99992	2.13929e-08	TRUE	19.3742	1.07762	0.224331	0.116331	0.139822	5.1917e+13	8.26284e+12	13.2116	0.999998	0.999999	1.26709e+11	3.73098e+10
Fe-16toFe-6	3.78497	0.186	5.68924	0.999999	4.39831e-10	TRUE	20.111	1.24981	0.312568	0.126568	0.21968	6.50753e+13	1.03571e+13	11.5856	0.999991	0.999995	7.7727e+09	1.35074e+09
Fe-16toFe-5	3.92687	0.102	6.97437	0.99963	9.69955e-08	TRUE	19.0538	0.94457	0.164742	0.0627419	0.135434	5.10958e+13	8.13216e+12	4.17081	0.98456	0.99222	1.56059e+11	1.16202e+11
Fe-16toFe-8	3.88288	0.255	6.87171	0.999984	2.59209e-09	TRUE	19.6396	1.07659	0.338252	0.0832523	0.156669	5.49557e+13	8.74647e+12	6.39535	0.998331	0.999165	4.5463e+08	2.33151e+08
Fe-16toFe-7	3.98116	0.108	7.70699	0.999889	2.51958e-08	TRUE	19.3705	1.07316	0.224526	0.116526	0.139245	5.18097e+13	8.24578e+12	13.311	0.999998	0.999999	1.26448e+11	3.72304e+10

## Sheet: Fe16(PO4)AsO4
path	hoping_distance(Å)	abatic_barrier_energy(eV)	DeltaQ2	fit_R_2	fit_diff_2_sum	root_T_or_F	Effective_Mass	reconfig_energy(eV)	diabati_active_energy(eV)	V_ab(eV)	A	Omega	v_eff(Hz)	pi_2_gamma	P_LZ	kappa_el	k_ET_adiabatic(Hz)	k_ET_diabatic
Fe-1toFe-12	3.87604	0.15	5.06993	0.999995	1.33192e-09	TRUE	19.2839	0.916416	0.225025	0.0750252	0.180755	5.90291e+13	9.39478e+12	5.24096	0.994705	0.997345	2.83037e+10	1.63821e+10
Fe-1toFe-11	3.87604	0.152	5.07406	0.999994	1.64237e-09	TRUE	19.2917	0.917702	0.225918	0.0739181	0.180862	5.90465e+13	9.39754e+12	5.08235	0.993795	0.996888	2.61923e+10	1.53516e+10
Fe-1toFe-10	3.87384	0.122	5.13062	0.999999	3.0678e-10	TRUE	19.2998	0.897363	0.21857	0.0965698	0.174903	5.80657e+13	9.24145e+12	8.92046	0.999866	0.999933	8.2452e+10	3.52084e+10
Fe-1toFe-9	3.87384	0.123	5.13679	0.999997	6.85593e-10	TRUE	19.3039	0.896704	0.218649	0.0956487	0.174565	5.80096e+13	9.23251e+12	8.76279	0.999844	0.999922	7.92459e+10	3.44473e+10
Fe-2toFe-11	3.86631	0.132	5.13005	0.999976	6.31525e-09	TRUE	19.2745	0.907156	0.226937	0.0949368	0.176832	5.8385e+13	9.29226e+12	8.52778	0.999802	0.999901	5.63087e+10	2.44859e+10
Fe-2toFe-12	3.86631	0.132	5.12615	0.999974	7.05e-09	TRUE	19.2683	0.905556	0.226472	0.0944717	0.176654	58355660846523	9.28759e+12	8.45612	0.999787	0.999894	5.62801e+10	2.47086e+10
Fe-2toFe-9	3.87968	0.136	5.19301	0.999979	5.48644e-09	TRUE	19.3822	0.905085	0.225058	0.089058	0.174289	5.79637e+13	9.2252e+12	7.56753	0.999483	0.999741	4.78811e+10	2.31981e+10
Fe-2toFe-10	3.87969	0.135	5.18606	0.999978	5.70904e-09	TRUE	19.377	0.902888	0.225179	0.0901786	0.174099	5.7932e+13	9.22017e+12	7.77284	0.999579	0.999789	4.97448e+10	2.37036e+10
Fe-3toFe-9	3.88319	0.145	5.28269	0.999994	1.39887e-09	TRUE	19.3342	0.974137	0.238069	0.0930686	0.184402	5.96216e+13	9.48907e+12	7.74465	0.999567	0.999783	3.47726e+10	1.47631e+10
Fe-3toFe-10	3.88319	0.147	5.2767	0.999993	1.31525e-09	TRUE	19.3314	0.970621	0.237889	0.0908888	0.183945	5.95477e+13	9.47731e+12	7.40865	0.999394	0.999697	3.21412e+10	1.42036e+10
Fe-3toFe-12	3.87674	0.165	5.15224	0.999997	6.94068e-10	TRUE	19.298	0.900847	0.23778	0.0727801	0.174846	5.80562e+13	9.23993e+12	5.05778	0.99364	0.99681	1.55741e+10	9.49355e+09
Fe-3toFe-11	3.87674	0.163	5.15681	0.999997	5.92938e-10	TRUE	19.3073	0.903547	0.239245	0.0762453	0.175214	5.81173e+13	9.24966e+12	5.53674	0.996061	0.998026	1.68651e+10	9.83027e+09
Fe-4toFe-9	3.85153	0.16	5.02815	0.999991	2.50395e-09	TRUE	19.3409	0.90295	0.205557	0.0455565	0.179579	5.88368e+13	9.36416e+12	1.95312	0.858169	0.923672	1.77462e+10	1.2922e+10
Fe-4toFe-10	3.85153	0.16	5.02156	0.999992	2.18136e-09	TRUE	19.336	0.902448	0.205721	0.0457212	0.179715	5.8859e+13	9.3677e+12	1.96707	0.860134	0.924809	1.77747e+10	1.29366e+10
Fe-4toFe-11	3.87993	0.172	5.01324	0.999995	1.20508e-09	TRUE	19.2601	0.858945	0.209182	0.0371825	0.171335	5.74704e+13	9.1467e+12	1.36571	0.7448	0.853737	1.0072e+10	7.67082e+09
Fe-4toFe-12	3.87993	0.146	5.00818	0.999997	7.65254e-10	TRUE	19.2529	0.857156	0.208792	0.0627919	0.171151	5.74396e+13	9.14179e+12	3.90099	0.979778	0.989786	3.19066e+10	2.22324e+10
Fe-5toFe-14	3.86199	0.147	4.99126	0.999963	9.24237e-09	TRUE	19.4304	0.882298	0.229047	0.082047	0.176768	5.83745e+13	9.29059e+12	6.45957	0.998435	0.999217	3.14928e+10	1.70905e+10
Fe-5toFe-13	3.86199	0.144	4.98293	0.99996	1.00921e-08	TRUE	19.4668	0.887696	0.231843	0.0878427	0.178147	5.86017e+13	9.32676e+12	7.35322	0.999359	0.99968	3.5522e+10	1.75288e+10
Fe-5toFe-16	3.85459	0.256	4.90347	0.999976	5.63192e-09	TRUE	19.487	0.86877	0.237107	-0.0188927	0.177174	58441515614001	9.30126e+12	0.344764	0.291613	0.451548	2.10201e+08	6.686e+08
Fe-5toFe-15	3.85459	0.257	4.90901	0.999972	6.87542e-09	TRUE	19.5064	0.867326	0.237794	-0.0192061	0.17668	5.836e+13	9.28828e+12	0.357092	0.300292	0.461884	2.06566e+08	6.73417e+08
Fe-6toFe-14	3.86385	0.169	4.66041	0.999941	1.39734e-08	TRUE	19.2745	0.856623	0.208418	0.0394181	0.183809	5.95256e+13	9.47379e+12	1.48389	0.773245	0.872124	1.19682e+10	8.8917e+09
Fe-6toFe-13	3.86385	0.169	4.64578	0.999932	1.59607e-08	TRUE	19.2918	0.858412	0.209912	0.0409125	0.184772	5.96815e+13	9.4986e+12	1.5927	0.796623	0.886801	1.22014e+10	9.03125e+09
Fe-6toFe-15	3.89676	0.196	4.62412	0.999961	1.10277e-08	TRUE	19.695	0.926428	0.238826	0.0428256	0.200347	6.21458e+13	9.89082e+12	1.61323	0.800757	0.889356	4.48387e+09	3.11291e+09
Fe-6toFe-16	3.89676	0.261	4.62539	0.999966	9.24237e-09	TRUE	19.6823	0.926742	0.23885	-0.0221499	0.20036	62147841636621	9.89114e+12	0.431468	0.350445	0.519007	2.11744e+08	8.31802e+08
Fe-7toFe-16	3.8644	0.271	4.97306	0.999953	1.04051e-08	TRUE	19.4298	0.841055	0.241854	-0.0291455	0.169122	5.7098e+13	9.08744e+12	0.853532	0.574092	0.729426	1.85705e+08	1.34591e+09
Fe-7toFe-15	3.86441	0.279	4.97816	0.999943	1.29203e-08	TRUE	19.448	0.840113	0.241776	-0.0372243	0.16876	5.70368e+13	9.0777e+12	1.39456	0.752057	0.858485	1.60219e+08	2.20337e+09
Fe-7toFe-14	3.87624	0.17	5.31801	0.999959	1.04051e-08	TRUE	19.6195	0.89661	0.256896	0.0868959	0.168599	5.70096e+13	9.07336e+12	7.35965	0.999364	0.999682	1.26403e+10	6.47581e+09
Fe-7toFe-13	3.87624	0.169	5.30941	0.999953	1.22856e-08	TRUE	19.6605	0.903296	0.259919	0.0909189	0.170131	5.72681e+13	9.1145e+12	7.99079	0.999661	0.999831	1.32003e+10	6.28357e+09
Fe-8toFe-15	3.92537	0.294	5.23834	0.999986	3.88644e-09	TRUE	19.6773	0.928249	0.249052	-0.0449483	0.177203	58446197566471	9.302e+12	1.88776	0.848589	0.918094	9.82836e+07	2.30658e+09
Fe-8toFe-16	3.92537	0.334	5.23048	0.999988	3.35904e-09	TRUE	19.6511	0.926962	0.24777	-0.0862301	0.177223	5.84495e+13	9.30253e+12	6.95208	0.999043	0.999521	2.27741e+07	8.92678e+09
Fe-8toFe-13	3.8568	0.168	5.27523	0.999985	4.33983e-09	TRUE	20.0123	0.972411	0.265456	0.0974557	0.184335	5.96108e+13	9.48736e+12	8.50106	0.999797	0.999898	1.42832e+10	5.6168e+09
Fe-8toFe-14	3.8568	0.168	5.27694	0.999992	2.36186e-09	TRUE	19.9525	0.963936	0.260957	0.0929571	0.18267	5.93409e+13	9.4444e+12	7.80362	0.999592	0.999796	1.42171e+10	6.1082e+09
Fe-9toFe-1	3.87384	0.139	5.13679	0.999975	7.17345e-09	TRUE	19.3039	0.917451	0.235089	0.0960887	0.178604	5.86768e+13	9.3387e+12	8.64361	0.999824	0.999912	4.31669e+10	1.81968e+10
Fe-9toFe-2	3.87968	0.147	5.19301	0.999982	5.29548e-09	TRUE	19.3822	0.940615	0.236418	0.089418	0.181131	5.90904e+13	9.40454e+12	7.34066	0.999351	0.999676	3.18937e+10	1.47827e+10
Fe-9toFe-4	3.85153	0.195	5.02815	0.999985	3.54661e-09	TRUE	19.3409	0.88032	0.240677	0.0456765	0.175078	5.80948e+13	9.24607e+12	2.01389	0.866532	0.928494	4.54863e+09	3.38171e+09
Fe-9toFe-3	3.88319	0.141	5.28269	0.999983	4.55395e-09	TRUE	19.3342	0.91221	0.233229	0.0922286	0.172679	5.76953e+13	9.1825e+12	8.12179	0.999703	0.999851	3.92826e+10	1.80665e+10
Fe-10toFe-1	3.87384	0.138	5.13062	0.999977	6.47768e-09	TRUE	19.2998	0.916164	0.23501	0.0970098	0.178568	5.86709e+13	9.33776e+12	8.8172	0.999852	0.999926	4.48655e+10	1.86171e+10
Fe-10toFe-2	3.87969	0.146	5.18606	0.99999	2.90847e-09	TRUE	19.377	0.943879	0.236539	0.0905386	0.182003	5.92325e+13	9.42715e+12	7.49475	0.999444	0.999722	3.32328e+10	1.50589e+10
Fe-10toFe-4	3.85153	0.195	5.02156	0.999989	2.95169e-09	TRUE	19.336	0.882015	0.240841	0.0458412	0.175646	5.81888e+13	9.26104e+12	2.02322	0.867771	0.929205	4.55948e+09	3.38126e+09
Fe-10toFe-3	3.88319	0.142	5.2767	0.999991	2.50395e-09	TRUE	19.3314	0.914062	0.233049	0.0910488	0.173226	5.77867e+13	9.19703e+12	7.8948	0.999627	0.999814	3.78505e+10	1.77122e+10
Fe-11toFe-3	3.87674	0.144	5.15681	0.999997	4.53107e-10	TRUE	19.3073	0.931952	0.219605	0.0756053	0.180723	5.90238e+13	9.39393e+12	5.27824	0.994899	0.997443	3.56978e+10	2.03451e+10
Fe-11toFe-4	3.87993	0.193	5.01324	1	4.54802e-11	TRUE	19.2601	0.89457	0.229502	0.0365025	0.178441	5.86501e+13	9.33446e+12	1.2638	0.717421	0.835463	4.46436e+09	3.30084e+09
Fe-11toFe-2	3.86631	0.129	5.13005	1	4.54802e-11	TRUE	19.2745	0.89457	0.223497	0.0944968	0.174378	5.79785e+13	9.22757e+12	8.56779	0.99981	0.999905	6.27974e+10	2.79064e+10
Fe-11toFe-1	3.87604	0.154	5.07406	0.999998	3.28814e-10	TRUE	19.2917	0.896422	0.227558	0.0735581	0.176668	5.83579e+13	9.28795e+12	5.15245	0.994215	0.997099	2.39647e+10	1.44363e+10
Fe-12toFe-3	3.87674	0.145	5.15224	0.999999	2.65819e-10	TRUE	19.298	0.922567	0.21812	0.0731201	0.179061	5.87519e+13	9.35065e+12	4.98495	0.99316	0.996568	3.41552e+10	2.02571e+10
Fe-12toFe-4	3.87993	0.166	5.00818	0.999999	7.51412e-11	TRUE	19.2529	0.893158	0.229092	0.0630919	0.17834	5.86334e+13	9.3318e+12	3.77961	0.977168	0.988452	1.50053e+10	1.00269e+10
Fe-12toFe-2	3.86631	0.129	5.12615	1	1.94915e-11	TRUE	19.2683	0.892373	0.223012	0.0940117	0.174083	5.79293e+13	9.21974e+12	8.49768	0.999796	0.999898	6.27437e+10	2.81785e+10
Fe-12toFe-1	3.87604	0.151	5.06993	0.999999	7.62712e-11	TRUE	19.2839	0.890584	0.226645	0.0756452	0.17566	5.81912e+13	9.26142e+12	5.48248	0.995841	0.997916	2.68586e+10	1.58676e+10
Fe-13toFe-8	3.8568	0.135	5.27523	0.999996	1.36836e-09	TRUE	20.0123	1.0172	0.231946	0.0969457	0.192826	6.09682e+13	9.70339e+12	8.0419	0.999678	0.999839	5.23545e+10	1.98654e+10
Fe-13toFe-7	3.87624	0.113	5.30941	0.999989	3.20311e-09	TRUE	19.6605	0.951381	0.204459	0.0914589	0.179188	5.87726e+13	9.35395e+12	7.6773	0.999537	0.999768	1.18189e+11	5.29389e+10
Fe-13toFe-5	3.86199	0.121	4.98293	0.999996	1.08729e-09	TRUE	19.4668	0.871469	0.208343	0.0873427	0.174891	5.80636e+13	9.24112e+12	7.40512	0.999392	0.999696	8.56805e+10	4.34093e+10
Fe-13toFe-6	3.86385	0.175	4.64578	0.999993	1.75932e-09	TRUE	19.2918	0.844821	0.215872	0.0408725	0.181847	5.92071e+13	9.42311e+12	1.61516	0.80114	0.889592	9.62752e+09	7.21506e+09
Fe-14toFe-8	3.8568	0.135	5.27694	0.99996	1.27777e-08	TRUE	19.9525	0.987539	0.227237	0.0922371	0.187143	6.0063e+13	9.55933e+12	7.49956	0.999447	0.999723	5.15712e+10	2.18966e+10
Fe-14toFe-7	3.87624	0.114	5.31801	0.999955	1.21653e-08	TRUE	19.6195	0.931733	0.201226	0.0872259	0.175203	5.81155e+13	9.24937e+12	7.13611	0.999204	0.999602	1.12415e+11	5.51388e+10
Fe-14toFe-5	3.86199	0.123	4.99126	0.999973	6.5065e-09	TRUE	19.4304	0.853515	0.205337	0.082337	0.171002	5.74145e+13	9.1378e+12	6.72469	0.998799	0.999399	7.8392e+10	4.37858e+10
Fe-14toFe-6	3.86385	0.175	4.66041	0.999972	5.96328e-09	TRUE	19.2745	0.834024	0.214168	0.0391681	0.178959	5.87352e+13	9.34799e+12	1.50482	0.777943	0.875105	9.39524e+09	7.12309e+09
Fe-15toFe-6	3.89676	0.198	4.62412	0.999998	7.64124e-10	TRUE	19.695	0.992687	0.240556	0.0425556	0.214676	6.43298e+13	1.02384e+13	1.48663	0.773867	0.87252	4.21458e+09	2.77722e+09
Fe-15toFe-5	3.85459	0.229	4.90901	0.999998	3.05085e-10	TRUE	19.5064	0.925612	0.210064	-0.0189361	0.188554	6.02891e+13	9.5953e+12	0.325264	0.277664	0.434643	5.93144e+08	1.85228e+09
Fe-15toFe-7	3.86441	0.219	4.97816	1	5.0565e-11	TRUE	19.448	0.847426	0.182086	-0.0369143	0.170229	5.72846e+13	9.11712e+12	1.35959	0.743234	0.852707	1.62787e+09	2.17115e+10
Fe-15toFe-8	3.92537	0.256	5.23834	0.999998	4.36158e-10	TRUE	19.6773	0.909479	0.211312	-0.0446883	0.17362	5.78523e+13	9.20748e+12	1.90449	0.851102	0.919562	4.23751e+08	9.91674e+09
Fe-16toFe-6	3.89676	0.263	4.62539	0.999999	3.25989e-10	TRUE	19.6823	0.992216	0.2405	-0.0224999	0.214515	6.43057e+13	1.02346e+13	0.415833	0.340209	0.507696	1.98366e+08	7.78207e+08
Fe-16toFe-5	3.85459	0.229	4.90347	0.999998	4.78531e-10	TRUE	19.487	0.91764	0.209297	-0.0197027	0.187141	60062755043761	9.55928e+12	0.354992	0.298821	0.460142	6.25585e+08	2.0746e+09
Fe-16toFe-7	3.8644	0.211	4.97306	1	1.58192e-11	TRUE	19.4298	0.846642	0.182084	-0.0289155	0.170246	5.72874e+13	9.11757e+12	0.83457	0.565939	0.722811	1.88044e+09	1.33287e+10
Fe-16toFe-8	3.92537	0.296	5.23048	0.999999	9.97175e-11	TRUE	19.6511	0.899969	0.20995	-0.0860501	0.172062	5.75922e+13	9.16609e+12	7.13073	0.9992	0.9996	9.75953e+07	3.89624e+10

## Sheet: Fe16(PO4)VO4
path	hoping_distance(Å)	abatic_barrier_energy(eV)	DeltaQ2	fit_R_2	fit_diff_2_sum	root_T_or_F	Effective_Mass	reconfig_energy(eV)	diabati_active_energy(eV)	V_ab(eV)	A	Omega	v_eff(Hz)	pi_2_gamma	P_LZ	kappa_el	k_ET_adiabatic(Hz)	k_ET_diabatic
Fe-1toFe-11	3.87645	0.15	5.14503	0.999995	1.30311e-09	TRUE	19.3264	0.926397	0.223825	0.0738247	0.180056	5.89149e+13	9.3766e+12	5.05695	0.993635	0.996807	2.82337e+10	1.65262e+10
Fe-1toFe-12	3.87645	0.151	5.12332	0.999996	1.20508e-09	TRUE	19.3286	0.925612	0.226054	0.0750536	0.180667	5.90146e+13	9.39247e+12	5.22008	0.994593	0.997289	2.72215e+10	1.56767e+10
Fe-1toFe-10	3.87253	0.127	5.18779	0.999995	1.22345e-09	TRUE	19.3719	0.917734	0.22825	0.10125	0.176903	5.83967e+13	9.29412e+12	9.64165	0.999935	0.999968	6.83421e+10	2.63184e+10
Fe-1toFe-9	3.87253	0.132	5.20908	0.999994	1.3822e-09	TRUE	19.3403	0.909322	0.225066	0.0930659	0.174565	5.80095e+13	9.2325e+12	8.23819	0.999736	0.999868	5.59448e+10	2.52662e+10
Fe-2toFe-11	3.86166	0.142	5.10233	0.999983	4.00678e-09	TRUE	19.3122	0.947081	0.236285	0.0942849	0.185617	5.98178e+13	9.52029e+12	8.03469	0.999676	0.999838	3.91819e+10	1.64641e+10
Fe-2toFe-12	3.86166	0.138	5.0782	0.999984	4.01667e-09	TRUE	19.3114	0.946296	0.23804	0.10004	0.186345	5.99349e+13	9.53893e+12	9.03158	0.99988	0.99994	4.58328e+10	1.73259e+10
Fe-2toFe-9	3.8809	0.15	5.18307	0.999992	1.73701e-09	TRUE	19.4295	0.950628	0.242471	0.092471	0.18341	5.9461e+13	9.46352e+12	7.76037	0.999574	0.999787	2.85806e+10	1.24432e+10
Fe-2toFe-10	3.8809	0.146	5.15517	0.999994	1.39887e-09	TRUE	19.4515	0.951915	0.244919	0.0989193	0.184652	5.96621e+13	9.49551e+12	8.8445	0.999856	0.999928	3.34807e+10	1.29437e+10
Fe-3toFe-9	3.88211	0.153	5.35322	0.999977	6.87542e-09	TRUE	19.3816	0.956215	0.239936	0.0869356	0.178624	5.86802e+13	9.33924e+12	6.93003	0.999022	0.999511	2.5108e+10	1.20958e+10
Fe-3toFe-10	3.8821	0.154	5.33234	0.999969	9.00395e-09	TRUE	19.4083	0.958506	0.243018	0.0890177	0.179753	58865284932727	9.3687e+12	7.23444	0.999279	0.999639	2.42346e+10	1.12434e+10
Fe-3toFe-12	3.87801	0.162	5.22255	0.999979	5.39802e-09	TRUE	19.3612	0.893189	0.239356	0.0773564	0.171025	5.74184e+13	9.13842e+12	5.80201	0.996979	0.998487	1.73274e+10	1.01337e+10
Fe-3toFe-11	3.87802	0.154	5.24491	0.999978	5.82599e-09	TRUE	19.3628	0.896673	0.237573	0.0835735	0.170961	5.74075e+13	9.13669e+12	6.7602	0.998841	0.99942	2.36293e+10	1.26479e+10
Fe-4toFe-9	3.84596	0.138	5.06318	0.999995	1.4565e-09	TRUE	19.5741	0.903892	0.2101	0.0721	0.178523	5.86635e+13	9.33658e+12	4.90402	0.992583	0.996278	4.46962e+10	2.7136e+10
Fe-4toFe-10	3.84596	0.142	5.04955	0.999997	8.62429e-10	TRUE	19.6146	0.908318	0.213521	0.0715211	0.179881	5.88862e+13	9.37203e+12	4.79561	0.991734	0.99585	3.84178e+10	2.33352e+10
Fe-4toFe-11	3.8745	0.125	5.06938	0.999998	3.0678e-10	TRUE	19.3754	0.875141	0.210459	0.0854595	0.172633	5.76876e+13	9.18127e+12	7.12045	0.999192	0.999596	7.29154e+10	3.82099e+10
Fe-4toFe-12	3.87451	0.125	5.04271	0.999998	4.39831e-10	TRUE	19.3748	0.872411	0.212807	0.0878068	0.173004	5.77497e+13	9.19115e+12	7.52065	0.999458	0.999729	7.30036e+10	3.68941e+10
Fe-5toFe-14	3.859	0.143	5.07674	0.999977	6.5065e-09	TRUE	19.7966	0.931293	0.237841	0.0948407	0.183443	5.94664e+13	9.46437e+12	8.24675	0.999738	0.999869	3.74749e+10	1.58182e+10
Fe-5toFe-13	3.85901	0.147	5.07589	0.999977	6.5065e-09	TRUE	19.8067	0.931293	0.238877	0.0918769	0.183474	5.94714e+13	9.46517e+12	7.73873	0.999564	0.999782	3.21028e+10	1.42617e+10
Fe-5toFe-16	3.84544	0.134	4.89132	0.999962	9.00395e-09	TRUE	19.7009	0.869617	0.215729	0.0817292	0.177788	5.85426e+13	9.31735e+12	6.43765	0.9984	0.999199	5.22208e+10	2.85929e+10
Fe-5toFe-15	3.84544	0.134	4.88975	0.999958	9.85169e-09	TRUE	19.7183	0.870904	0.218737	0.0847367	0.178108	5.85953e+13	9.32573e+12	6.90882	0.999001	0.9995	5.22835e+10	2.73402e+10
Fe-6toFe-13	3.85511	0.21	4.62723	0.999985	4.55395e-09	TRUE	19.6177	0.956654	0.272218	0.0622182	0.206744	6.31303e+13	1.00475e+13	3.29859	0.963065	0.981185	2.92391e+09	1.77685e+09
Fe-6toFe-14	3.85511	0.216	4.62924	0.999981	5.76582e-09	TRUE	19.6069	0.95521	0.270701	0.0547006	0.206343	6.30689e+13	1.00377e+13	2.55404	0.922233	0.959543	2.26496e+09	1.45755e+09
Fe-6toFe-15	3.89452	0.19	4.54568	0.999995	1.20508e-09	TRUE	19.4799	0.825612	0.224166	0.0341663	0.181626	5.91711e+13	9.41737e+12	1.14237	0.680938	0.810188	4.90519e+09	3.70031e+09
Fe-6toFe-16	3.89452	0.19	4.5497	0.999995	1.06328e-09	TRUE	19.4684	0.822913	0.221646	0.0316457	0.180872	5.90482e+13	9.39781e+12	0.983681	0.626068	0.770039	4.65243e+09	3.50531e+09
Fe-7toFe-16	3.86859	0.175	5.00227	0.999996	7.36158e-10	TRUE	19.5755	0.857188	0.223818	0.0488183	0.17136	5.74745e+13	9.14736e+12	2.35647	0.905245	0.950267	9.98321e+09	7.51457e+09
Fe-7toFe-15	3.86859	0.183	4.99924	0.999998	4.77684e-10	TRUE	19.588	0.856905	0.224937	0.0419369	0.171407	5.74825e+13	9.14862e+12	1.739	0.824304	0.903692	6.96805e+09	5.31143e+09
Fe-7toFe-14	3.87465	0.16	5.52899	0.999999	4.18362e-10	TRUE	20.0324	0.985719	0.278684	0.118684	0.178282	5.86239e+13	9.33028e+12	12.7333	0.999997	0.999999	1.91431e+10	4.96001e+09
Fe-7toFe-13	3.87465	0.186	5.51968	0.999999	3.4209e-10	TRUE	20.0295	0.980822	0.27932	0.0933203	0.177695	5.85274e+13	9.31492e+12	7.90508	0.999631	0.999816	6.98935e+09	2.99945e+09
Fe-8toFe-15	3.94089	0.23	5.11022	0.999982	4.55395e-09	TRUE	19.4022	0.878876	0.242888	0.0128878	0.171984	5.75791e+13	9.164e+12	0.161896	0.149471	0.260069	3.26094e+08	2.47353e+08
Fe-8toFe-16	3.94089	0.242	5.11549	0.999985	3.96243e-09	TRUE	19.3907	0.880571	0.241533	-0.0004671	0.172138	5.76049e+13	9.16811e+12	0.000212367	0.000212344	0.000424598	334839	342075
Fe-8toFe-13	3.852	0.257	5.31689	0.999985	4.79661e-09	TRUE	20.0125	0.991902	0.294305	0.0373052	0.186557	5.9969e+13	9.54436e+12	1.22599	0.706532	0.828033	3.80526e+08	2.66964e+08
Fe-8toFe-14	3.852	0.255	5.32504	0.999984	4.98559e-09	TRUE	20.0183	0.996704	0.294597	0.0395968	0.187173	6.00679e+13	9.56011e+12	1.37563	0.747321	0.85539	4.25418e+08	2.96679e+08
Fe-9toFe-1	3.87253	0.144	5.20908	0.999991	2.74746e-09	TRUE	19.3403	0.938983	0.237096	0.0930959	0.180259	5.8948e+13	9.38187e+12	7.98311	0.999659	0.999829	3.57373e+10	1.56227e+10
Fe-9toFe-2	3.8809	0.143	5.18307	0.999984	4.97853e-09	TRUE	19.4295	0.960138	0.235221	0.092221	0.185245	5.97577e+13	9.51074e+12	7.64201	0.99952	0.99976	3.76544e+10	1.63009e+10
Fe-9toFe-4	3.84596	0.167	5.06318	0.99998	5.16836e-09	TRUE	19.5741	0.891274	0.23904	0.07204	0.176031	5.82526e+13	9271185100496	4.96518	0.993023	0.996499	1.44589e+10	8.90646e+09
Fe-9toFe-3	3.88211	0.142	5.35322	0.999981	4.98559e-09	TRUE	19.3816	0.918927	0.228886	0.0868856	0.171659	5.75246e+13	9.15533e+12	7.20295	0.999256	0.999628	3.76719e+10	1.88975e+10
Fe-10toFe-1	3.87253	0.139	5.18779	0.999999	1.48023e-10	TRUE	19.3719	0.956811	0.24044	0.10144	0.184435	5.9627e+13	9.48993e+12	9.28261	0.999907	0.999953	4.38678e+10	1.61455e+10
Fe-10toFe-2	3.8809	0.139	5.15517	0.999999	7.62712e-11	TRUE	19.4515	0.979473	0.237829	0.0988293	0.189998	6.05195e+13	9.63198e+12	8.58002	0.999812	0.999906	4.45223e+10	1.67563e+10
Fe-10toFe-4	3.84596	0.171	5.04955	0.999999	1.31356e-10	TRUE	19.6146	0.914218	0.242621	0.0716211	0.18105	5.90772e+13	9.40242e+12	4.77799	0.991587	0.995776	1.25524e+10	7.56764e+09
Fe-10toFe-3	3.8821	0.143	5.33234	1	1.07345e-11	TRUE	19.4083	0.941745	0.232128	0.0891277	0.17661	5.83483e+13	9.28643e+12	7.38141	0.999377	0.999689	3.67637e+10	1.73278e+10
Fe-11toFe-3	3.87802	0.137	5.24491	0.999996	1.20508e-09	TRUE	19.3628	0.936723	0.220583	0.0835835	0.178597	5.86756e+13	9.33851e+12	6.47271	0.998455	0.999227	4.66061e+10	2.38811e+10
Fe-11toFe-4	3.8745	0.148	5.06938	0.999993	1.89237e-09	TRUE	19.3754	0.898964	0.233459	0.0854595	0.177332	5.84675e+13	9.30539e+12	6.93175	0.999024	0.999512	3.03551e+10	1.54868e+10
Fe-11toFe-2	3.86166	0.129	5.10233	0.999992	2.1065e-09	TRUE	19.3122	0.890552	0.223095	0.0940949	0.174538	5.80051e+13	9.2318e+12	8.5103	0.999799	0.999899	6.28258e+10	2.81664e+10
Fe-11toFe-1	3.87645	0.156	5.14503	0.999995	1.25226e-09	TRUE	19.3264	0.889297	0.229915	0.0739147	0.172846	5.77232e+13	9.18693e+12	5.28077	0.994911	0.997449	2.19471e+10	1.33598e+10
Fe-12toFe-3	3.87801	0.145	5.22255	0.999982	4.60847e-09	TRUE	19.3612	0.956121	0.222436	0.0774364	0.183075	5.94067e+13	9.45488e+12	5.43134	0.995623	0.997807	3.45788e+10	1.88854e+10
Fe-12toFe-4	3.87451	0.148	5.04271	0.999979	4.87768e-09	TRUE	19.3748	0.920873	0.235877	0.0878768	0.182615	5.9332e+13	9.44298e+12	7.13623	0.999204	0.999602	3.08067e+10	1.4735e+10
Fe-12toFe-2	3.86166	0.125	5.0782	0.999994	1.22712e-09	TRUE	19.3114	0.905273	0.22492	0.0999201	0.178267	58621372461520	9.32988e+12	9.41822	0.999919	0.999959	7.41226e+10	2.93551e+10
Fe-12toFe-1	3.87645	0.157	5.12332	0.99999	2.31949e-09	TRUE	19.3286	0.907627	0.232214	0.0752136	0.177156	5.84385e+13	9.30077e+12	5.34624	0.995234	0.997611	2.13795e+10	1.2528e+10
Fe-13toFe-8	3.852	0.18	5.31689	0.999998	4.93785e-10	TRUE	20.0125	1.04658	0.216945	0.0369452	0.196841	6.15996e+13	9.80389e+12	1.13962	0.68006	0.809566	7.51249e+09	5.08124e+09
Fe-13toFe-7	3.87465	0.131	5.51968	0.999996	1.11102e-09	TRUE	20.0295	1.03098	0.22422	0.0932203	0.186782	6.00052e+13	9.55012e+12	7.50439	0.999449	0.999725	6.01432e+10	2.45991e+10
Fe-13toFe-6	3.85511	0.149	4.62723	1	4.37853e-11	TRUE	19.6177	0.973792	0.211978	0.0629782	0.210448	6.36932e+13	1.01371e+13	3.32019	0.963854	0.981594	3.12432e+10	1.85494e+10
Fe-13toFe-5	3.85901	0.131	5.07589	0.999999	1.42373e-10	TRUE	19.8067	0.917702	0.223537	0.0925369	0.180797	5.90359e+13	9.39585e+12	7.96657	0.999653	0.999827	5.91776e+10	2.63805e+10
Fe-14toFe-8	3.852	0.177	5.32504	1	1.0226e-10	TRUE	20.0183	1.043	0.217197	0.0401968	0.195867	6.14471e+13	9.77962e+12	1.35471	0.741979	0.85188	8.85587e+09	5.96697e+09
Fe-14toFe-7	3.87465	0.105	5.52899	0.999996	1.31186e-09	TRUE	20.0324	1.0194	0.223544	0.118544	0.184373	5.9617e+13	9.48833e+12	12.2836	0.999995	0.999998	1.63405e+11	4.10651e+10
Fe-14toFe-6	3.85511	0.155	4.62924	0.999995	1.64237e-09	TRUE	19.6069	0.962147	0.210421	0.0554206	0.207841	6.32975e+13	1.00741e+13	2.60281	0.925935	0.961543	2.41152e+10	1.53486e+10
Fe-14toFe-5	3.859	0.127	5.07674	0.999998	5.83051e-10	TRUE	19.7966	0.909228	0.222461	0.0954607	0.179097	5.87577e+13	9.35158e+12	8.55769	0.999808	0.999904	6.87602e+10	2.94033e+10
Fe-15toFe-6	3.89452	0.157	4.54568	0.999996	9.31921e-10	TRUE	19.4799	0.835436	0.191626	0.0346263	0.183787	59522094792767	9.47324e+12	1.15954	0.686369	0.81402	1.77685e+10	1.33025e+10
Fe-15toFe-5	3.84544	0.146	4.88975	0.999999	1.12429e-10	TRUE	19.7183	0.928688	0.231097	0.0850967	0.189925	6.05079e+13	9.63014e+12	6.53412	0.998547	0.999273	3.39332e+10	1.65537e+10
Fe-15toFe-7	3.86859	0.155	4.99924	0.999998	5.5904e-10	TRUE	19.588	0.830665	0.197537	0.0425369	0.166158	5.65955e+13	9.00746e+12	1.84564	0.842075	0.914268	2.05017e+10	1.60178e+10
Fe-15toFe-8	3.94089	0.18	5.11022	0.999995	1.20508e-09	TRUE	19.4022	0.858945	0.193228	0.0132278	0.168084	5.69225e+13	9.0595e+12	0.174509	0.16013	0.276056	2.3672e+09	1.79956e+09
Fe-16toFe-6	3.89452	0.157	4.5497	0.999959	8.80932e-09	TRUE	19.4684	0.817043	0.189046	0.0320457	0.179582	5.88372e+13	9.36424e+12	1.01595	0.637942	0.778956	1.68074e+10	1.27306e+10
Fe-16toFe-5	3.84544	0.147	4.89132	0.999964	9.89463e-09	TRUE	19.7009	0.905116	0.228029	0.0810292	0.185046	5.97256e+13	9.50562e+12	6.07966	0.997711	0.998854	3.221e+10	1.71186e+10
Fe-16toFe-7	3.86859	0.147	5.00227	0.999978	4.75395e-09	TRUE	19.5755	0.821124	0.196358	0.0493583	0.16415	5.62525e+13	8.95286e+12	2.51468	0.919112	0.957851	2.90917e+10	2.27039e+10
Fe-16toFe-8	3.94089	0.193	5.11549	0.999967	7.51328e-09	TRUE	19.3907	0.845606	0.191813	-0.0011871	0.165303	5.64497e+13	8.98425e+12	0.00142836	0.00142734	0.00285061	1.4661e+07	1.54289e+07

## Sheet: Fe16(PO4)PO3F
	hoping_distance(Å)	abatic_barrier_energy(eV)	DeltaQ2	fit_R_2	fit_diff_2_sum	root_T_or_F	Effective_Mass	reconfig_energy	diabati_active_energy	mean_reconfig_energy	V_ab	A	Omega	v_eff(Hz)	pi_2_gamma	P_LZ	kappa_el	k_ET_adiabatic(Hz)	k_ET_diabatic
Fe_1-1toFe_1-12	3.82764	0.146	4.69506	0.99995	1.19167e-08	TRUE	19.369	0.935185	0.241369	0.907078	0.0953688	0.199185	6.19654e+13	9.8621e+12	7.98588	0.99966	0.99983	3.47699e+10	1.39253e+10
Fe_1-1toFe_1-11	3.84851	0.155	4.73735	0.999984	4.33616e-09	TRUE	19.5739	0.976146	0.260976	0.951773	0.105976	0.206053	6.30247e+13	1.00307e+13	9.48983	0.999924	0.999962	2.49706e+10	7.88333e+09
Fe_1-1toFe_1-9	3.8248	0.118	4.69755	0.999988	3.04802e-09	TRUE	19.4401	0.920967	0.231845	0.916761	0.113845	0.196053	6.14763e+13	9.78425e+12	11.5587	0.99999	0.999995	1.01909e+11	2.89026e+10
Fe_1-1toFe_1-10	3.87293	0.094	4.98574	0.999981	4.60847e-09	TRUE	19.4048	0.933898	0.206197	0.943738	0.112197	0.187314	6.00905e+13	9.5637e+12	11.4055	0.999989	0.999994	2.52054e+11	7.51823e+10
Fe_1-2toFe_1-11	3.83151	0.135	4.58734	0.999998	3.05085e-10	TRUE	19.4309	0.914501	0.232932	0.895841	0.0979325	0.199353	6.19916e+13	9.86626e+12	8.51211	0.999799	0.999899	5.32364e+10	2.05791e+10
Fe_1-2toFe_1-12	3.85267	0.22	4.67968	0.999998	3.99153e-10	TRUE	19.2566	0.881827	0.217014	0.864909	-0.00298577	0.188437	6.02705e+13	9.59234e+12	0.00828755	0.00825331	0.0163715	3.16356e+07	3.60581e+07
Fe_1-2toFe_1-10	3.80305	0.079	4.79111	1	6.24294e-11	TRUE	19.422	0.90091	0.187372	0.917028	0.108372	0.188038	6.02065e+13	9.58216e+12	10.8133	0.99998	0.99999	4.51147e+11	1.47926e+11
Fe_1-2toFe_1-9	3.85692	0.129	4.96402	0.999999	1.77684e-10	TRUE	19.5404	0.950502	0.228209	0.955571	0.0992092	0.191478	6.07548e+13	9.66943e+12	8.7429	0.99984	0.99992	6.58054e+10	2.48679e+10
Fe_1-3toFe_1-9	3.87425	0.147	4.90013	0.999999	2.15254e-10	TRUE	19.5595	0.981733	0.244919	0.961896	0.0979188	0.200348	6.21461e+13	9.89086e+12	8.19277	0.999723	0.999862	3.35492e+10	1.24893e+10
Fe_1-3toFe_1-10	3.81777	0.074	4.9061	0.999999	2.11017e-10	TRUE	19.3708	0.919868	0.199197	0.910091	0.125197	0.187495	6.01195e+13	9.56832e+12	14.3026	0.999999	1	5.46626e+11	1.23658e+11
Fe_1-3toFe_1-11	3.82365	0.153	4.52469	0.999995	1.29209e-09	TRUE	19.4683	0.87897	0.248011	0.893817	0.0950105	0.194261	6.11947e+13	9.73943e+12	8.2785	0.999746	0.999873	2.61934e+10	1.10261e+10
Fe_1-3toFe_1-12	3.87702	0.154	4.81438	0.999991	2.12345e-09	TRUE	19.5489	0.934118	0.254145	0.951836	0.100145	0.194027	6.11578e+13	9.73356e+12	8.92727	0.999867	0.999934	2.51859e+10	9.37269e+09
Fe_1-4toFe_1-9	3.80677	0.125	4.78275	1	7.79661e-11	TRUE	19.3425	0.918079	0.213064	0.892326	0.0880637	0.191956	6.08306e+13	9.68149e+12	7.00068	0.999089	0.999544	7.68841e+10	3.58179e+10
Fe_1-4toFe_1-10	3.87964	0.128	4.85569	0.999999	7.17514e-11	TRUE	19.3068	0.918205	0.185231	0.907282	0.0572313	0.189099	6.03762e+13	9.60916e+12	2.9788	0.949146	0.97391	6.62062e+10	4.43922e+10
Fe_1-4toFe_1-12	3.8226	0.135	4.6685	0.999997	5.92938e-10	TRUE	19.3615	0.885342	0.226108	0.897285	0.091108	0.189642	60462747409636	9.62295e+12	7.67677	0.999537	0.999768	5.19167e+10	2.35705e+10
Fe_1-4toFe_1-11	3.84151	0.138	4.64971	0.999999	2.65819e-10	TRUE	19.457	0.900345	0.238209	0.913434	0.100209	0.193635	6.10959e+13	9.72372e+12	9.11391	0.99989	0.999945	4.67208e+10	1.77065e+10
Fe_1-5toFe_1-13	3.85573	0.126	4.43634	0.999996	1.15395e-09	TRUE	19.6499	0.935938	0.222236	0.915474	0.0962363	0.210971	6.37723e+13	1.01497e+13	7.89825	0.999629	0.999814	7.75648e+10	2.97103e+10
Fe_1-5toFe_1-14	3.86799	0.166	4.52523	0.999998	3.94068e-10	TRUE	19.1775	0.834181	0.169976	0.817389	0.0039765	0.18434	5.96116e+13	9.48748e+12	0.0152809	0.0151648	0.0298765	4.61108e+08	4.05649e+08
Fe_1-5toFe_1-15	3.84801	0.132	4.52863	1	4.37853e-11	TRUE	19.5839	0.870653	0.225688	0.874686	0.0936877	0.192255	6.0878e+13	9.68903e+12	8.13	0.999705	0.999853	5.87102e+10	2.55455e+10
Fe_1-5toFe_1-16	3.8337	0.019	5.35452	1	1.58192e-11	TRUE	19.6627	0.924419	0.151066	0.944115	0.132066	0.172643	5.76893e+13	9.18153e+12	16.5447	1	1	4.4028e+12	8.8331e+11
Fe_1-6toFe_1-13	3.75929	0.129	4.04979	0.999955	9.77542e-09	TRUE	19.4636	0.856215	0.213885	0.830979	0.0848849	0.211422	6.38405e+13	1.01605e+13	6.41774	0.998368	0.999183	6.90966e+10	3.33826e+10
Fe_1-6toFe_1-14	3.82355	0.178	4.16613	0.999877	1.96141e-08	TRUE	18.8835	0.74639	0.159361	0.727417	-0.018639	0.179157	5.87675e+13	9.35314e+12	0.360024	0.30234	0.464303	4.4411e+09	1.4206e+10
Fe_1-6toFe_1-16	3.71981	0.023	5.33535	0.999962	1.45429e-08	TRUE	20.6003	1.15756	0.212225	1.15665	0.189225	0.216961	6.46714e+13	1.02928e+13	27.0756	1	1	4.22814e+12	1.52134e+11
Fe_1-6toFe_1-15	3.8436	0.146	4.67141	0.999955	1.31641e-08	TRUE	19.9399	0.97398	0.265702	0.983082	0.119702	0.208498	6.33975e+13	1.009e+13	12.0493	0.999994	0.999997	3.55794e+10	8.38675e+09
Fe_1-7toFe_1-15	3.74618	0.247	4.40167	1	1.94915e-11	TRUE	20.4454	1.1146	0.386933	1.12035	0.139933	0.253221	6.98668e+13	1.11196e+13	13.9676	0.999999	1	7.88267e+08	9.84801e+07
Fe_1-7toFe_1-13	3.65628	0.25	4.48577	0.999996	1.43136e-09	TRUE	20.4213	1.092	0.368871	1.11325	0.118871	0.243436	6.85035e+13	1.09027e+13	10.3858	0.999969	0.999985	6.88195e+08	1.4439e+08
Fe_1-7toFe_1-14	3.89619	0.28	5.21313	0.999999	3.33051e-10	TRUE	20.7971	1.35188	0.401901	1.37695	0.121901	0.259323	7.07036e+13	1.12528e+13	9.5107	0.999926	0.999963	2.22563e+08	3.80332e+07
Fe_1-7toFe_1-16	4.35317	0.256	6.11109	1	6.24294e-11	TRUE	20.3963	1.38798	0.342433	1.38586	0.0864331	0.227125	66168770998122	1.05311e+13	5.04225	0.993541	0.99676	5.25355e+08	1.8828e+08
Fe_1-8toFe_1-15	3.86534	0.201	5.17203	0.99999	2.76243e-09	TRUE	19.8745	1.05647	0.318259	1.02883	0.117259	0.204265	6.27506e+13	9.98707e+12	11.2164	0.999987	0.999993	4.1955e+09	1.01183e+09
Fe_1-8toFe_1-13	3.80137	0.17	4.6723	1	5.64972e-11	TRUE	19.5526	0.892404	0.270014	0.897003	0.100014	0.190999	6.06787e+13	9.65732e+12	9.1814	0.999897	0.999949	1.34574e+10	5.17687e+09
Fe_1-8toFe_1-16	3.83992	0.135	6.62179	0.999987	5.19407e-09	TRUE	19.9388	1.21196	0.25131	1.18211	0.11631	0.183026	5.93987e+13	9.4536e+12	10.8848	0.999981	0.999991	5.10144e+10	1.23859e+10
Fe_1-8toFe_1-14	3.88337	0.158	5.35826	0.999997	8.43785e-10	TRUE	19.7581	1.05213	0.279293	1.05739	0.121293	0.196358	6.1524e+13	9.79185e+12	12.2659	0.999995	0.999998	2.1706e+10	4.89756e+09
Fe_1-9toFe_1-1	3.8248	0.113	4.69755	0.999975	7.00226e-09	TRUE	19.4401	0.912555	0.226555	0.916761	0.113555	0.194262	6.11949e+13	9.73947e+12	11.6059	0.999991	0.999995	1.23088e+11	3.54472e+10
Fe_1-9toFe_1-2	3.85692	0.151	4.96402	0.999982	5.48644e-09	TRUE	19.5404	0.96064	0.249869	0.955571	0.0988692	0.193521	6.1078e+13	9.72086e+12	8.59144	0.999814	0.999907	2.82472e+10	1.06287e+10
Fe_1-9toFe_1-4	3.80677	0.145	4.78275	0.999974	5.89746e-09	TRUE	19.3425	0.866573	0.232754	0.892326	0.0877537	0.181187	59099601678265	9.40599e+12	7.36466	0.999367	0.999683	3.44647e+10	1.70922e+10
Fe_1-9toFe_1-3	3.87425	0.138	4.90013	0.999985	4.16836e-09	TRUE	19.5595	0.942059	0.236009	0.961896	0.0980088	0.192252	6.08774e+13	9.68894e+12	8.5535	0.999807	0.999904	4.65518e+10	1.80292e+10
Fe_1-10toFe_1-2	3.80305	0.167	4.79111	0.999998	4.89831e-10	TRUE	19.422	0.933145	0.276102	0.917028	0.109102	0.194766	6.12741e+13	9.75208e+12	10.5808	0.999975	0.999987	1.52621e+10	4.76039e+09
Fe_1-10toFe_1-1	3.87293	0.155	4.98574	0.999998	3.78814e-10	TRUE	19.4048	0.953578	0.267977	0.943738	0.112977	0.191261	6.07203e+13	9.66394e+12	11.326	0.999988	0.999994	2.40584e+10	6.91428e+09
Fe_1-10toFe_1-3	3.81777	0.132	4.9061	0.999998	5.71751e-10	TRUE	19.3708	0.900314	0.257357	0.910091	0.125357	0.183509	5.94771e+13	9.46607e+12	14.6507	1	1	5.73677e+10	1.32116e+10
Fe_1-10toFe_1-4	3.87964	0.215	4.85569	1	9.88701e-11	TRUE	19.3068	0.896359	0.271991	0.907282	0.0569913	0.1846	5.96536e+13	9.49417e+12	3.02586	0.951484	0.975139	2.26299e+09	1.55375e+09
Fe_1-11toFe_1-4	3.84151	0.118	4.64971	0.999997	8.98023e-10	TRUE	19.457	0.926522	0.218509	0.913434	0.100509	0.199264	6.19777e+13	9.86406e+12	8.90952	0.999865	0.999932	1.02734e+11	3.76228e+10
Fe_1-11toFe_1-3	3.82365	0.105	4.52469	0.999992	2.08136e-09	TRUE	19.4683	0.908663	0.199711	0.893817	0.0947105	0.200823	6.22197e+13	9.90257e+12	7.95749	0.99965	0.999825	1.7051e+11	6.98014e+10
Fe_1-11toFe_1-2	3.83151	0.118	4.58734	0.999997	7.98023e-10	TRUE	19.4309	0.877181	0.215202	0.895841	0.0972025	0.191218	6.07135e+13	9.66285e+12	8.74245	0.99984	0.99992	1.00637e+11	4.10985e+10
Fe_1-11toFe_1-1	3.84851	0.11	4.73735	0.999993	1.80932e-09	TRUE	19.5739	0.927401	0.216296	0.951773	0.106296	0.195764	6.14309e+13	9.77703e+12	10.049	0.999957	0.999978	1.38765e+11	4.58187e+10
Fe_1-12toFe_1-4	3.8226	0.132	4.6685	0.999998	5.83051e-10	TRUE	19.3615	0.909228	0.222458	0.897285	0.090458	0.194758	6.12729e+13	9.75189e+12	7.36881	0.999369	0.999685	5.90812e+10	2.6405e+10
Fe_1-12toFe_1-3	3.87702	0.122	4.81438	0.999997	1.00904e-09	TRUE	19.5489	0.969554	0.221895	0.951836	0.0998955	0.201387	6.2307e+13	9.91647e+12	8.5581	0.999808	0.999904	8.84719e+10	3.18701e+10
Fe_1-12toFe_1-1	3.82764	0.117	4.69506	0.999995	1.29209e-09	TRUE	19.369	0.87897	0.212739	0.907078	0.0957388	0.187212	6.00741e+13	9.5611e+12	8.56268	0.999809	0.999904	1.03503e+11	4.3812e+10
Fe_1-12toFe_1-2	3.85267	0.218	4.67968	0.999998	4.92938e-10	TRUE	19.2566	0.847991	0.215334	0.864909	-0.00266577	0.181207	5.91029e+13	9.40651e+12	0.00686991	0.00684637	0.0135996	2.7843e+07	3.12791e+07
Fe_1-13toFe_1-8	3.80137	0.082	4.6723	0.999997	7.65254e-10	TRUE	19.5526	0.901601	0.182524	0.897003	0.100524	0.192967	60990578825972	9.70695e+12	9.18067	0.999897	0.999948	4.06931e+11	1.53471e+11
Fe_1-13toFe_1-7	3.65628	0.081	4.48577	0.999996	1.81328e-09	TRUE	20.4213	1.13449	0.198981	1.11325	0.117981	0.25291	6.98238e+13	1.11128e+13	9.84759	0.999947	0.999974	4.84253e+11	9.97114e+10
Fe_1-13toFe_1-6	3.75929	0.117	4.04979	0.999998	4.39831e-10	TRUE	19.4636	0.805744	0.201595	0.830979	0.0845949	0.198959	6.19303e+13	9.85651e+12	6.77322	0.998856	0.999428	1.0665e+11	5.49798e+10
Fe_1-13toFe_1-5	3.85573	0.139	4.43634	0.999996	9.58475e-10	TRUE	19.6499	0.895009	0.235276	0.915474	0.0962763	0.201745	6.23623e+13	9.92527e+12	8.2663	0.999743	0.999871	4.58764e+10	1.83618e+10
Fe_1-14toFe_1-7	3.89619	0.168	5.21313	0.999999	5.42938e-10	TRUE	20.7971	1.40201	0.289941	1.37695	0.121941	0.268938	7.20024e+13	1.14595e+13	9.17669	0.999897	0.999948	1.72532e+10	2.84045e+09
Fe_1-14toFe_1-8	3.88337	0.128	5.35826	1	7.17514e-11	TRUE	19.7581	1.06265	0.249733	1.05739	0.121733	0.19832	6.18307e+13	9.84066e+12	12.2328	0.999995	0.999998	6.96174e+10	1.54011e+10
Fe_1-14toFe_1-6	3.82355	0.224	4.16613	0.999997	5.5904e-10	TRUE	18.8835	0.708443	0.205001	0.727417	-0.018999	0.170048	5.72541e+13	9.11228e+12	0.394102	0.325715	0.49138	7.72698e+08	2.59238e+09
Fe_1-14toFe_1-5	3.86799	0.237	4.52523	0.999981	4.09802e-09	TRUE	19.1775	0.800596	0.240946	0.817389	0.0039465	0.176918	5.83993e+13	9.29453e+12	0.0156826	0.0155603	0.0306437	2.97265e+07	2.61971e+07
Fe_1-15toFe_1-6	3.8436	0.107	4.67141	0.999987	4.38559e-09	TRUE	19.9399	0.992185	0.226412	0.983082	0.119412	0.212395	6.39872e+13	1.01839e+13	11.771	0.999992	0.999996	1.62327e+11	3.78015e+10
Fe_1-15toFe_1-5	3.84801	0.118	4.52863	0.999975	6.44576e-09	TRUE	19.5839	0.878719	0.211728	0.874686	0.0937277	0.194037	6.11593e+13	9.73381e+12	8.06225	0.999685	0.999842	1.01368e+11	4.36718e+10
Fe_1-15toFe_1-7	3.74618	0.05	4.40167	0.999996	1.4565e-09	TRUE	20.4454	1.12611	0.190043	1.12035	0.140043	0.255838	7.02269e+13	1.1177e+13	13.8465	0.999999	1	1.6157e+12	1.99253e+11
Fe_1-15toFe_1-8	3.86534	0.086	5.17203	0.999996	1.29209e-09	TRUE	19.8745	1.00119	0.203769	1.02883	0.117769	0.193578	6.1087e+13	9.72231e+12	11.9388	0.999993	0.999997	3.49166e+11	8.78808e+10
Fe_1-16toFe_1-6	3.71981	0.189	5.33535	0.999998	8.89831e-10	TRUE	20.6003	1.15574	0.377905	1.15665	0.188905	0.21662	6.46205e+13	1.02847e+13	27.0266	1	1	6.87275e+09	2.49917e+08
Fe_1-16toFe_1-5	3.8337	0.21	5.35452	0.999999	1.60734e-10	TRUE	19.6627	0.96381	0.342076	0.944115	0.132076	0.179999	5.89056e+13	9.37511e+12	15.8709	1	1	2.78056e+09	5.34922e+08
Fe_1-16toFe_1-8	3.83992	0.226	6.62179	0.999998	6.85593e-10	TRUE	19.9388	1.15226	0.34179	1.18211	0.11579	0.17401	57917334845878	9.21783e+12	11.3466	0.999988	0.999994	1.47229e+09	3.80195e+08
Fe_1-16toFe_1-7	4.35317	0.264	6.11109	0.999997	1.90226e-09	TRUE	20.3963	1.38374	0.350513	1.38586	0.0865131	0.226431	6.60677e+13	1.0515e+13	5.06705	0.993699	0.99684	3.84973e+08	1.38208e+08

## Sheet: Fe16(PO4)PO3S
	hoping_distance(Å)	abatic_barrier_energy(eV)	DeltaQ2	fit_R_2	fit_diff_2_sum	root_T_or_F	Effective_Mass	reconfig_energy	diabati_active_energy	V_ab	A	Omega	v_eff(Hz)	pi_2_gamma	P_LZ	kappa_el	k_ET_adiabatic(Hz)	k_ET_diabatic
Fe_1-1toFe_1-11	3.90237	0.132	5.61351	0.99999	3.04802e-09	TRUE	19.3641	0.990144	0.233976	0.101976	0.176386	5.83113e+13	9.28053e+12	9.42982	0.99992	0.99996	5.6241e+10	2.05959e+10
Fe_1-1toFe_1-12	3.87404	0.128	5.69001	0.999979	6.75169e-09	TRUE	19.4035	1.00687	0.234378	0.106378	0.176955	5.84053e+13	9.29548e+12	10.1594	0.999961	0.999981	6.57595e+10	2.18827e+10
Fe_1-1toFe_1-9	3.87767	0.139	5.14956	0.999987	3.06073e-09	TRUE	19.3371	0.886033	0.236686	0.097686	0.17206	5.75918e+13	9.16602e+12	9.26164	0.999905	0.999952	4.23704e+10	1.79907e+10
Fe_1-1toFe_1-10	3.88627	0.142	5.66574	0.999981	5.31836e-09	TRUE	19.3417	0.936503	0.236126	0.0941262	0.165292	5.64479e+13	8.98396e+12	8.53351	0.999803	0.999902	3.69768e+10	1.66027e+10
Fe_1-2toFe_1-11	3.86835	0.09	5.4393	0.999994	1.92712e-09	TRUE	19.4966	1.00527	0.21059	0.12059	0.184817	59688634260199	9.49974e+12	12.785	0.999997	0.999999	2.92266e+11	7.06284e+10
Fe_1-2toFe_1-12	3.89094	0.156	5.52031	0.999996	1.31186e-09	TRUE	19.4888	1.00829	0.206102	0.0501017	0.18265	59337770937941	9.4439e+12	2.21662	0.891023	0.942371	2.13152e+10	1.44816e+10
Fe_1-2toFe_1-10	3.84938	0.109	5.65895	1	8.38983e-11	TRUE	19.5812	0.973352	0.211911	0.102911	0.172002	5.75822e+13	9.16449e+12	9.80861	0.999945	0.999973	1.352e+11	4.96708e+10
Fe_1-2toFe_1-9	3.89826	0.127	5.47195	0.999999	1.77684e-10	TRUE	19.573	1.00606	0.238317	0.111317	0.183857	5.95335e+13	9.47505e+12	10.9185	0.999982	0.999991	6.96741e+10	2.05834e+10
Fe_1-3toFe_1-9	3.90275	0.157	5.49906	0.999995	1.41582e-09	TRUE	19.4289	1.0059	0.26476	0.10776	0.182922	5.93819e+13	9.45093e+12	10.2586	0.999965	0.999982	2.17762e+10	6.9363e+09
Fe_1-3toFe_1-10	3.89969	0.132	5.35726	0.999997	5.92938e-10	TRUE	19.2792	0.925769	0.231018	0.0990182	0.172806	57716609548680	9.18588e+12	9.28938	0.999908	0.999954	5.56671e+10	2.25166e+10
Fe_1-3toFe_1-11	3.88544	0.138	5.46188	0.999997	4.98023e-10	TRUE	19.2574	0.921626	0.234391	0.0963907	0.168738	5.70331e+13	9.0771e+12	8.92841	0.999867	0.999934	4.36135e+10	1.87699e+10
Fe_1-3toFe_1-12	3.90909	0.141	5.65992	1	9.88701e-11	TRUE	19.4208	0.985248	0.245997	0.104997	0.174075	5.7928e+13	9.21953e+12	10.088	0.999958	0.999979	3.94461e+10	1.37489e+10
Fe_1-4toFe_1-10	3.90282	0.135	5.68022	0.999986	3.99802e-09	TRUE	19.3086	0.962367	0.226895	0.0918955	0.169424	5.7149e+13	9.09555e+12	7.92534	0.999639	0.999819	4.90739e+10	2.231e+10
Fe_1-4toFe_1-9	3.87359	0.142	5.6025	0.999979	5.70904e-09	TRUE	19.2194	0.936221	0.236399	0.0943988	0.167108	56756975284604	9.03315e+12	8.53754	0.999804	0.999902	3.71794e+10	1.65264e+10
Fe_1-4toFe_1-11	3.8943	0.129	5.5875	0.999977	6.15904e-09	TRUE	19.2737	0.917483	0.222878	0.0938778	0.164203	5.62615e+13	8.9543e+12	8.60447	0.999817	0.999908	6.09378e+10	2.7855e+10
Fe_1-4toFe_1-12	3.89581	0.122	5.64047	0.999969	8.80932e-09	TRUE	19.3307	0.939266	0.224143	0.102143	0.166523	5.66575e+13	9.01732e+12	9.99704	0.999954	0.999977	8.04559e+10	3.10347e+10
Fe_1-5toFe_1-13	3.88424	0.157	5.79892	0.999995	2.28192e-09	TRUE	19.8903	1.13358	0.304493	0.147493	0.195482	61386717892789	9.77e+12	17.5126	1	1	2.25118e+10	2.63219e+09
Fe_1-5toFe_1-14	3.89312	0.158	6.02167	0.99999	4.37853e-09	TRUE	19.9895	1.18431	0.299929	0.141929	0.196674	6.15736e+13	9.79974e+12	15.817	1	1	2.17236e+10	2.84501e+09
Fe_1-5toFe_1-16	3.8259	0.244	5.09371	0.999977	5.70904e-09	TRUE	19.5324	0.891777	0.298728	0.0547281	0.175074	58094060545081	9.24596e+12	2.87256	0.943446	0.9709	7.14672e+08	5.1067e+08
Fe_1-5toFe_1-15	3.91118	0.317	5.75293	0.999997	1.02768e-09	TRUE	19.8052	1.07357	0.30747	-0.00953042	0.186613	5.9978e+13	9.5458e+12	0.0768997	0.0740173	0.137833	6.22012e+06	1.00648e+07
Fe_1-6toFe_1-13	3.85732	0.145	5.42057	1	1.94915e-11	TRUE	19.0573	0.847928	0.216062	0.0710619	0.156428	5.49134e+13	8.73973e+12	5.25442	0.994776	0.997381	3.19497e+10	2.16109e+10
Fe_1-6toFe_1-14	3.90374	0.14	5.51743	1	8.22034e-11	TRUE	19.1373	0.8871	0.207907	0.0679074	0.160781	5.56722e+13	8.86051e+12	4.62719	0.990218	0.995085	3.92123e+10	2.64494e+10
Fe_1-6toFe_1-16	3.82649	0.224	5.16865	0.999999	2.65819e-10	TRUE	19.0879	0.755901	0.249085	0.0250851	0.146247	5.30964e+13	8.45055e+12	0.717206	0.511886	0.677149	9.87495e+08	7.95083e+08
Fe_1-6toFe_1-15	3.8911	0.2	5.5249	0.999999	1.27119e-10	TRUE	19.1087	0.850282	0.235239	0.0352387	0.1539	5.44679e+13	8.66883e+12	1.30084	0.727698	0.842391	3.18876e+09	2.52744e+09
Fe_1-7toFe_1-15	3.80215	0.178	4.42246	0.999998	5.20339e-10	TRUE	20.1597	0.970998	0.237173	0.0591735	0.21956	6.50576e+13	1.03542e+13	2.87379	0.943516	0.970937	1.02811e+10	6.1882e+09
Fe_1-7toFe_1-13	3.78705	0.193	4.63432	0.999984	4.55395e-09	TRUE	20.1386	0.923321	0.219235	0.0262355	0.199235	6.19732e+13	9.86335e+12	0.608144	0.45564	0.626034	3.5348e+09	2.4967e+09
Fe_1-7toFe_1-14	3.92228	0.141	4.82857	0.999962	8.69237e-09	TRUE	19.6209	0.856591	0.184368	0.0433678	0.177401	5.84788e+13	9.30719e+12	1.82835	0.839321	0.912642	3.63432e+10	2.72875e+10
Fe_1-7toFe_1-16	4.13883	0.151	4.1727	0.999988	2.41412e-09	TRUE	20.5215	0.809165	0.227621	0.0766212	0.193919	6.11408e+13	9.73086e+12	5.61638	0.996362	0.998178	2.82274e+10	1.64464e+10
Fe_1-8toFe_1-15	3.90669	0.155	5.56408	0.999999	2.65819e-10	TRUE	20.1262	1.14479	0.27965	0.12465	0.205746	6.29777e+13	1.00232e+13	12.1323	0.999995	0.999997	2.49529e+10	4.89066e+09
Fe_1-8toFe_1-16	3.95405	0.237	6.06538	0.999999	6.53955e-10	TRUE	20.9763	1.34554	0.359366	0.122366	0.22184	6.53944e+13	1.04078e+13	10.3859	0.999969	0.999985	1.08625e+09	1.99087e+08
Fe_1-8toFe_1-13	3.87294	0.12	5.38411	0.999993	2.21836e-09	TRUE	20.15	1.02169	0.246298	0.126298	0.18976	6.04816e+13	9.62595e+12	13.7285	0.999999	0.999999	9.27966e+10	1.93091e+10
Fe_1-8toFe_1-14	3.89094	0.103	5.42798	0.999996	1.22345e-09	TRUE	20.0289	1.07329	0.241743	0.138743	0.197733	6.17391e+13	9.82608e+12	15.8347	1	1	1.82834e+11	2.71157e+10
Fe_1-9toFe_1-2	3.89826	0.164	5.47195	0.999997	1.15395e-09	TRUE	19.573	1.04705	0.275867	0.111867	0.191349	6.07342e+13	9.66616e+12	10.5949	0.999975	0.999987	1.69891e+10	4.76776e+09
Fe_1-9toFe_1-1	3.87767	0.119	5.14956	0.999997	9.42938e-10	TRUE	19.3371	0.931325	0.217406	0.098406	0.180855	5.90454e+13	9.39737e+12	8.9416	0.999869	0.999935	9.41599e+10	3.75397e+10
Fe_1-9toFe_1-4	3.87359	0.13	5.6025	0.99999	2.53701e-09	TRUE	19.2194	0.906183	0.224289	0.0942888	0.161746	5.58391e+13	8.88706e+12	8.8	0.999849	0.999925	5.81864e+10	2.67723e+10
Fe_1-9toFe_1-3	3.90275	0.119	5.49906	0.999994	1.81328e-09	TRUE	19.4289	0.956717	0.22687	0.10787	0.173978	5.7912e+13	9.21698e+12	10.808	0.99998	0.99999	9.23575e+10	3.0862e+10
Fe_1-10toFe_1-1	3.88627	0.149	5.66574	0.999986	4.52599e-09	TRUE	19.3417	0.981858	0.243376	0.0943762	0.173298	5.77986e+13	9.19893e+12	8.18262	0.999721	0.99986	2.88793e+10	1.23146e+10
Fe_1-10toFe_1-2	3.84938	0.173	5.65895	0.999976	7.26582e-09	TRUE	19.5812	0.970025	0.275991	0.102991	0.171414	5.74837e+13	9.14881e+12	9.85756	0.999948	0.999974	1.13522e+10	4.17852e+09
Fe_1-10toFe_1-3	3.89969	0.121	5.35726	0.999971	7.23729e-09	TRUE	19.2792	0.877024	0.219658	0.0986582	0.163708	5.61766e+13	8.94078e+12	9.7345	0.999941	0.99997	8.29186e+10	3.56388e+10
Fe_1-10toFe_1-4	3.90282	0.149	5.68022	0.999961	1.04506e-08	TRUE	19.3086	0.911833	0.241315	0.0923155	0.160528	5.56283e+13	8.85353e+12	8.4412	0.999784	0.999892	2.77958e+10	1.32412e+10
Fe_1-11toFe_1-4	3.8943	0.154	5.5875	1	9.97175e-11	TRUE	19.2737	0.966635	0.248598	0.0945978	0.173	5.77489e+13	9.19102e+12	8.29269	0.99975	0.999875	2.37806e+10	1.0189e+10
Fe_1-11toFe_1-3	3.88544	0.138	5.46188	0.999998	5.83051e-10	TRUE	19.2574	0.953672	0.234331	0.0963307	0.174605	5.80162e+13	9.23357e+12	8.61765	0.999819	0.99991	4.43642e+10	1.84717e+10
Fe_1-11toFe_1-2	3.86835	0.166	5.4393	1	4.29379e-11	TRUE	19.4966	0.972379	0.28597	0.11997	0.178769	5.8704e+13	9.34303e+12	13.0819	0.999998	0.999999	1.51988e+10	3.84944e+09
Fe_1-11toFe_1-1	3.90237	0.151	5.61351	0.999996	1.06328e-09	TRUE	19.3641	0.956246	0.252526	0.101526	0.170347	5.73045e+13	9.12029e+12	9.67812	0.999937	0.999969	2.65037e+10	1.01362e+10
Fe_1-12toFe_1-4	3.89581	0.158	5.64047	0.999993	2.34209e-09	TRUE	19.3307	0.993252	0.259863	0.101863	0.176094	5.8263e+13	9.27285e+12	9.40191	0.999917	0.999959	2.05547e+10	7.53804e+09
Fe_1-12toFe_1-3	3.90909	0.151	5.65992	0.999992	2.98616e-09	TRUE	19.4208	1.02244	0.255937	0.104937	0.180646	5.90113e+13	9.39194e+12	9.70987	0.999939	0.99997	2.72932e+10	9.17787e+09
Fe_1-12toFe_1-1	3.87404	0.156	5.69001	0.999995	1.4565e-09	TRUE	19.4035	0.98167	0.262928	0.106928	0.172525	5.76696e+13	9.17841e+12	10.5283	0.999973	0.999987	2.19825e+10	7.42107e+09
Fe_1-12toFe_1-2	3.89094	0.241	5.52031	0.999993	2.34209e-09	TRUE	19.4888	0.97103	0.291482	0.0504817	0.175901	58231170211590	9.26778e+12	2.33671	0.903355	0.949224	7.86543e+08	5.51104e+08
Fe_1-13toFe_1-7	3.78705	0.226	4.63432	0.999987	3.82175e-09	TRUE	20.1386	0.960797	0.252575	0.0265755	0.207322	6.32184e+13	1.00615e+13	0.599669	0.451007	0.621647	9.99021e+08	6.91551e+08
Fe_1-13toFe_1-8	3.87294	0.137	5.38411	0.999985	4.97853e-09	TRUE	20.15	1.01569	0.263158	0.126158	0.188647	6.03039e+13	9.59766e+12	13.7789	0.999999	0.999999	4.79365e+10	1.00657e+10
Fe_1-13toFe_1-6	3.85732	0.123	5.42057	0.999961	8.01243e-09	TRUE	19.0573	0.793534	0.194602	0.0716019	0.146393	5.31228e+13	8.45476e+12	5.70024	0.996655	0.998325	7.24543e+10	5.20184e+10
Fe_1-13toFe_1-5	3.88424	0.105	5.79892	0.999977	8.58192e-09	TRUE	19.8903	1.08914	0.252743	0.147743	0.187818	6.01713e+13	9.57656e+12	18.289	1	1	1.64925e+11	1.99451e+10
Fe_1-14toFe_1-8	3.89094	0.16	5.42798	0.999999	5.20339e-10	TRUE	20.0289	1.08211	0.298723	0.138723	0.199358	6.19922e+13	9.86637e+12	15.7011	1	1	2.0243e+10	2.97918e+09
Fe_1-14toFe_1-7	3.92228	0.215	4.82857	0.999997	8.62429e-10	TRUE	19.6209	0.897207	0.257828	0.0428278	0.185812	5.98491e+13	9.52528e+12	1.70238	0.817751	0.899739	2.09485e+09	1.51687e+09
Fe_1-14toFe_1-5	3.89312	0.147	6.02167	0.999999	4.36158e-10	TRUE	19.9895	1.1683	0.288299	0.141299	0.194016	6.11561e+13	9.73329e+12	15.8917	1	1	3.30193e+10	4.45195e+09
Fe_1-14toFe_1-6	3.90374	0.159	5.51743	0.999994	1.45169e-09	TRUE	19.1373	0.851318	0.226567	0.0675674	0.154296	5.45379e+13	8.67998e+12	4.77352	0.991549	0.995757	1.84327e+10	1.29874e+10
Fe_1-15toFe_1-6	3.8911	0.164	5.5249	0.999979	5.70226e-09	TRUE	19.1087	0.883741	0.198569	0.0345687	0.159956	5.55292e+13	8.83775e+12	1.20445	0.700144	0.823629	1.27937e+10	9.85495e+09
Fe_1-15toFe_1-5	3.91118	0.25	5.75293	0.999969	1.26788e-08	TRUE	19.8052	1.11309	0.24051	-0.00949042	0.193482	6.10719e+13	9.71989e+12	0.0735484	0.0709088	0.132427	8.12501e+07	1.30672e+08
Fe_1-15toFe_1-7	3.80215	0.196	4.42246	0.999991	3.07881e-09	TRUE	20.1597	0.998023	0.255303	0.0593035	0.225671	65956704263302	1.04973e+13	2.80828	0.939691	0.968908	5.1845e+09	3.04046e+09
Fe_1-15toFe_1-8	3.90669	0.156	5.56408	0.999995	1.98192e-09	TRUE	20.1262	1.09975	0.2813	0.1253	0.197651	6.17264e+13	9.82406e+12	12.7612	0.999997	0.999999	2.35291e+10	4.73024e+09
Fe_1-16toFe_1-6	3.82649	0.12	5.16865	0.999997	4.50565e-10	TRUE	19.0879	0.800722	0.145285	0.0252851	0.154919	54647883704381	8.69748e+12	0.687899	0.497369	0.664324	5.57009e+10	4.35076e+10
Fe_1-16toFe_1-5	3.8259	0.109	5.09371	1	4.54802e-11	TRUE	19.5324	0.927903	0.164638	0.0556381	0.182166	5.92591e+13	9.43138e+12	2.85329	0.942346	0.970317	1.35011e+11	9.25664e+10
Fe_1-16toFe_1-8	3.95405	0.171	6.06538	1	1.75141e-10	TRUE	20.9763	1.25869	0.293886	0.122886	0.207521	6.32488e+13	1.00664e+13	11.1971	0.999986	0.999993	1.34957e+10	2.61355e+09
Fe_1-16toFe_1-7	4.13883	0.102	4.1727	0.999994	1.29209e-09	TRUE	20.5215	0.809918	0.178621	0.0766212	0.194099	6.11692e+13	9.73539e+12	5.61116	0.996343	0.998168	1.87946e+11	1.09404e+11

## Sheet: Fe16(PO4)PO3Cl
	hoping_distance(Å)	abatic_barrier_energy(eV)	DeltaQ2	fit_R_2	fit_diff_2_sum	root_T_or_F	Effective_Mass	reconfig_energy	diabati_active_energy	V_ab	A	Omega	v_eff(Hz)	pi_2_gamma	P_LZ	kappa_el	k_ET_adiabatic(Hz)	k_ET_diabatic
Fe_1-1toFe_1-11	3.85814	0.155	4.88627	0.999988	3.84294e-09	TRUE	19.5608	0.957564	0.251412	0.0964122	0.19597	61463327239051	9.78219e+12	8.13153	0.999706	0.999853	2.43493e+10	9.53673e+09
Fe_1-1toFe_1-12	3.83369	0.139	5.02855	0.999987	3.70904e-09	TRUE	19.3985	0.941557	0.224709	0.0857086	0.187242	6.0079e+13	9.56188e+12	6.62996	0.99868	0.999339	4.41732e+10	2.13524e+10
Fe_1-1toFe_1-9	3.83232	0.125	4.75366	0.999986	3.77034e-09	TRUE	19.4971	0.890113	0.233638	0.108638	0.187248	6.00799e+13	9.56201e+12	10.9552	0.999983	0.999991	7.59693e+10	2.49778e+10
Fe_1-1toFe_1-10	3.86741	0.086	5.31781	0.999987	3.52797e-09	TRUE	19.4738	0.945857	0.202263	0.116263	0.177866	5.85555e+13	9.31939e+12	12.4885	0.999996	0.999998	3.34696e+11	9.34031e+10
Fe_1-2toFe_1-11	3.82686	0.113	4.7543	0.999994	1.84972e-09	TRUE	19.5885	0.953735	0.221447	0.108447	0.200605	6.21859e+13	9.89719e+12	10.1892	0.999962	0.999981	1.2508e+11	3.85329e+10
Fe_1-2toFe_1-12	3.86004	0.101	4.9214	1	1.0226e-10	TRUE	19.4088	0.93189	0.195552	0.0945516	0.189355	6.0417e+13	9.61566e+12	8.06501	0.999686	0.999843	1.93279e+11	8.06849e+10
Fe_1-2toFe_1-10	3.79619	0.062	5.19495	0.999994	1.76328e-09	TRUE	19.666	0.948839	0.176604	0.114604	0.182646	5.93371e+13	9.4438e+12	11.956	0.999994	0.999997	8.58205e+11	2.4448e+11
Fe_1-2toFe_1-9	3.86401	0.122	5.06894	0.999997	9.42938e-10	TRUE	19.6978	0.997991	0.233542	0.111542	0.196884	6.16064e+13	9.80497e+12	10.6365	0.999976	0.999988	8.74845e+10	2.49596e+10
Fe_1-3toFe_1-9	3.87253	0.157	5.0519	0.999998	5.20339e-10	TRUE	19.6028	1.00433	0.264362	0.107362	0.198803	6.19059e+13	9.85263e+12	9.77556	0.999943	0.999972	2.27016e+10	6.99733e+09
Fe_1-3toFe_1-10	3.85023	0.073	4.95827	0.999999	1.48023e-10	TRUE	19.3332	0.901255	0.19098	0.11798	0.181768	5.91943e+13	9.42107e+12	13.0322	0.999998	0.999999	5.5944e+11	1.52452e+11
Fe_1-3toFe_1-11	3.8344	0.148	4.78483	0.999992	2.00311e-09	TRUE	19.4225	0.896767	0.253712	0.105712	0.187419	6.01074e+13	9.56638e+12	10.3298	0.999967	0.999984	3.12212e+10	1.08391e+10
Fe_1-3toFe_1-12	3.8884	0.154	5.15923	0.999993	2.08136e-09	TRUE	19.579	0.986441	0.254717	0.100717	0.191199	6.07105e+13	9.66238e+12	8.85139	0.999857	0.999928	2.50015e+10	9.02349e+09
Fe_1-4toFe_1-9	3.81841	0.137	5.09465	0.999986	4.24887e-09	TRUE	19.3547	0.938826	0.225386	0.0883863	0.184277	5.96014e+13	9.48585e+12	7.11754	0.999189	0.999594	4.73589e+10	2.2152e+10
Fe_1-4toFe_1-10	3.89165	0.088	5.25349	0.999992	2.39237e-09	TRUE	19.3549	0.94548	0.180686	0.0926859	0.179972	5.89011e+13	9.37439e+12	7.89199	0.999626	0.999813	3.1155e+11	1.36795e+11
Fe_1-4toFe_1-11	3.84584	0.135	4.90184	0.999993	2.00311e-09	TRUE	19.4533	0.918989	0.234903	0.0999029	0.187478	6.01169e+13	9.5679e+12	9.11199	0.99989	0.999945	5.16289e+10	1.97954e+10
Fe_1-4toFe_1-12	3.84266	0.112	5.00736	0.999992	2.28192e-09	TRUE	19.4103	0.933584	0.216778	0.104778	0.186442	5.99506e+13	9.54143e+12	9.97192	0.999953	0.999977	1.25339e+11	4.35524e+10
Fe_1-5toFe_1-13	3.84669	0.153	4.71077	0.999983	5.48644e-09	TRUE	19.9342	1.00508	0.265752	0.112752	0.213359	6.41322e+13	1.0207e+13	10.4036	0.99997	0.999985	2.74538e+10	7.3108e+09
Fe_1-5toFe_1-14	3.86818	0.097	4.98191	0.999991	2.63729e-09	TRUE	19.4973	0.934087	0.20293	0.10593	0.187496	6.01197e+13	9.56834e+12	10.161	0.999961	0.999981	2.24543e+11	7.60378e+10
Fe_1-5toFe_1-16	3.81658	0.034	5.16172	0.999981	3.99802e-09	TRUE	19.5453	0.817922	0.138325	0.104325	0.158459	55268734004140	8796292215190	11.4564	0.999989	0.999995	2.36114e+12	9.59227e+11
Fe_1-5toFe_1-15	3.86691	0.158	4.7341	0.999981	5.3565e-09	TRUE	19.8049	0.936849	0.269654	0.111654	0.197894	6.17642e+13	9.83008e+12	10.9721	0.999983	0.999991	2.17906e+10	6.3853e+09
Fe_1-6toFe_1-13	3.76872	0.138	4.39064	0.999991	2.1065e-09	TRUE	19.5101	0.846108	0.220974	0.0829744	0.192707	6.09495e+13	9.70041e+12	6.46121	0.998437	0.999218	4.65749e+10	2.43909e+10
Fe_1-6toFe_1-14	3.84798	0.088	4.59075	0.999984	2.66582e-09	TRUE	18.9794	0.741086	0.152281	0.0642806	0.16143	5.57845e+13	8.87838e+12	4.52711	0.989188	0.994565	2.93516e+11	2.22989e+11
Fe_1-6toFe_1-16	3.73584	0.047	5.29841	0.999994	1.80932e-09	TRUE	20.214	0.971846	0.166634	0.119634	0.183422	5.9463e+13	9.46383e+12	12.8461	0.999997	0.999999	1.53639e+12	3.87119e+11
Fe_1-6toFe_1-15	3.84971	0.183	4.79869	0.999996	9.36158e-10	TRUE	19.6494	0.894225	0.254962	0.0719622	0.186348	5.99353e+13	9.539e+12	4.80741	0.991831	0.995899	8.0067e+09	4.79256e+09
Fe_1-7toFe_1-15	3.74911	0.352	4.04989	0.999999	2.36158e-10	TRUE	20.7268	1.09466	0.416909	0.0649091	0.270295	7.21838e+13	1.14884e+13	2.93521	0.946881	0.972716	1.36429e+07	6.70602e+06
Fe_1-7toFe_1-13	3.67239	0.326	4.24986	0.999998	5.93785e-10	TRUE	20.5408	1.03547	0.389068	0.0630679	0.243648	6.85333e+13	1.09074e+13	3.00092	0.950259	0.974495	3.54767e+07	1.91097e+07
Fe_1-7toFe_1-14	3.89866	0.28	4.95277	1	1.4548e-10	TRUE	20.6114	1.20938	0.377016	0.0970158	0.244184	68608699422088	1.09194e+13	6.56345	0.998589	0.999294	2.15824e+08	6.66921e+07
Fe_1-7toFe_1-16	4.33276	0.215	5.72279	1	2.15254e-10	TRUE	21.1779	1.35951	0.352096	0.137096	0.237561	6.76719e+13	1.07703e+13	12.5331	0.999996	0.999998	2.63261e+09	3.29357e+08
Fe_1-8toFe_1-15	3.85767	0.199	4.90542	0.999995	1.64746e-09	TRUE	20.1532	1.03879	0.303266	0.104266	0.211765	6.38922e+13	1.01688e+13	8.78385	0.999847	0.999923	4.61511e+09	1.44089e+09
Fe_1-8toFe_1-13	3.7956	0.161	4.5985	0.999965	9.37627e-09	TRUE	20.2078	0.909416	0.264099	0.103099	0.197764	6.17439e+13	9.82685e+12	9.49823	0.999925	0.999963	1.93962e+10	6.85042e+09
Fe_1-8toFe_1-16	3.90811	0.106	6.65471	0.999997	2.45056e-09	TRUE	21.3883	1.46368	0.286381	0.180381	0.219947	6.51149e+13	1.03634e+13	21.7313	1	1	1.71703e+11	6.98114e+09
Fe_1-8toFe_1-14	3.89436	0.134	5.19987	0.999991	3.20311e-09	TRUE	20.1596	1.06249	0.25411	0.12011	0.204331	6.27607e+13	9.98868e+12	11.7332	0.999992	0.999996	5.6028e+10	1.26589e+10
Fe_1-9toFe_1-2	3.86401	0.161	5.06894	0.999991	3.1065e-09	TRUE	19.6978	1.02426	0.272982	0.111982	0.202067	6.2412e+13	9.93318e+12	10.4456	0.999971	0.999985	1.96065e+10	5.40072e+09
Fe_1-9toFe_1-1	3.83232	0.112	4.75366	0.999998	4.78531e-10	TRUE	19.4971	0.928751	0.220878	0.108878	0.195376	61370026609461	9.76734e+12	10.5459	0.999974	0.999987	1.28308e+11	4.02348e+10
Fe_1-9toFe_1-4	3.81841	0.149	5.09465	0.999995	1.29209e-09	TRUE	19.3547	0.912304	0.237316	0.0883163	0.179071	5.87535e+13	9.3509e+12	7.31286	0.999333	0.999666	2.93507e+10	1.41427e+10
Fe_1-9toFe_1-3	3.87253	0.122	5.0519	0.999996	1.15395e-09	TRUE	19.6028	0.969272	0.229832	0.107832	0.191863	6.08158e+13	9.67913e+12	10.218	0.999963	0.999982	8.63612e+10	2.73225e+10
Fe_1-10toFe_1-2	3.79619	0.204	5.19495	0.999997	8.0678e-10	TRUE	19.666	0.986252	0.318834	0.114834	0.189848	6.04957e+13	9.62819e+12	11.5487	0.99999	0.999995	3.60158e+09	9.82263e+08
Fe_1-10toFe_1-1	3.86741	0.177	5.31781	0.999996	9.65819e-10	TRUE	19.4738	1.01146	0.292293	0.115293	0.190202	6.0552e+13	9.63715e+12	11.4845	0.99999	0.999995	1.02442e+10	2.72952e+09
Fe_1-10toFe_1-3	3.85023	0.141	4.95827	0.999999	2.70339e-10	TRUE	19.3332	0.890113	0.25924	0.11824	0.179521	5.88273e+13	9.36265e+12	13.2536	0.999998	0.999999	4.00592e+10	1.09908e+10
Fe_1-10toFe_1-4	3.89165	0.203	5.25349	0.999999	3.94068e-10	TRUE	19.3549	0.932486	0.295406	0.0924059	0.177498	58494900706555	9.30975e+12	7.95369	0.999649	0.999824	3.61919e+09	1.61896e+09
Fe_1-11toFe_1-4	3.84584	0.132	4.90184	0.999995	1.4565e-09	TRUE	19.4533	0.948336	0.231823	0.0998229	0.193465	6.10692e+13	9.71947e+12	8.81587	0.999852	0.999926	5.8899e+10	2.19172e+10
Fe_1-11toFe_1-3	3.8344	0.098	4.78483	0.999995	1.62175e-09	TRUE	19.4225	0.931795	0.204172	0.106172	0.19474	6.127e+13	9.75143e+12	10.0281	0.999956	0.999978	2.20156e+11	7.28919e+10
Fe_1-11toFe_1-2	3.82686	0.137	4.7543	0.999988	3.35904e-09	TRUE	19.5885	0.915851	0.245877	0.108877	0.192636	6.09383e+13	9.69863e+12	10.695	0.999977	0.999989	4.84403e+10	1.54051e+10
Fe_1-11toFe_1-1	3.85814	0.127	4.88627	0.999998	5.64124e-10	TRUE	19.5608	0.940647	0.223642	0.0966422	0.192508	60917956091445	9.69539e+12	8.31732	0.999756	0.999878	7.12863e+10	2.83045e+10
Fe_1-12toFe_1-4	3.84266	0.148	5.00736	0.999937	1.78195e-08	TRUE	19.4103	0.94096	0.252608	0.104608	0.187916	6.01869e+13	9.57905e+12	9.86167	0.999948	0.999974	3.12623e+10	1.08137e+10
Fe_1-12toFe_1-3	3.8884	0.143	5.15923	0.999962	1.25938e-08	TRUE	19.579	1.00898	0.244087	0.101087	0.195567	6.14001e+13	9.77213e+12	8.71739	0.999836	0.999918	3.86954e+10	1.35591e+10
Fe_1-12toFe_1-1	3.83369	0.15	5.02855	0.999962	9.42175e-09	TRUE	19.3985	0.901538	0.235849	0.0858486	0.179284	5.87884e+13	9.35647e+12	6.9469	0.999038	0.999519	2.82497e+10	1.42282e+10
Fe_1-12toFe_1-2	3.86004	0.164	4.9214	0.999946	1.31641e-08	TRUE	19.4088	0.881576	0.258892	0.0948916	0.179131	5.87633e+13	9.35248e+12	8.58673	0.999813	0.999907	1.64364e+10	7.20937e+09
Fe_1-13toFe_1-8	3.7956	0.092	4.5985	0.999997	8.62429e-10	TRUE	20.2078	0.919429	0.195489	0.103489	0.199941	6.20829e+13	9.8808e+12	9.46601	0.999923	0.999961	2.81348e+11	9.75476e+10
Fe_1-13toFe_1-7	3.67239	0.097	4.24986	0.999999	2.06497e-10	TRUE	20.5408	1.06871	0.160078	0.0630779	0.251469	6.96246e+13	1.10811e+13	2.90851	0.945443	0.971957	2.52756e+11	1.32249e+11
Fe_1-13toFe_1-6	3.76872	0.111	4.39064	0.999985	3.21186e-09	TRUE	19.5101	0.813936	0.194594	0.0835944	0.18538	5.97795e+13	9.5142e+12	6.81735	0.998905	0.999452	1.29842e+11	7.00287e+10
Fe_1-13toFe_1-5	3.84669	0.117	4.71077	0.999991	2.74746e-09	TRUE	19.9342	0.972316	0.229462	0.112462	0.206403	6.30781e+13	1.00392e+13	10.6989	0.999977	0.999989	1.08688e+11	3.01003e+10
Fe_1-14toFe_1-8	3.89436	0.16	5.19987	0.999997	1.14972e-09	TRUE	20.1596	1.07225	0.27994	0.11994	0.206208	6.30483e+13	1.00345e+13	11.5935	0.999991	0.999995	2.05878e+10	4.62652e+09
Fe_1-14toFe_1-7	3.89866	0.145	4.95277	1	1.0226e-10	TRUE	20.6114	1.243	0.242466	0.0974658	0.250971	69555680868893	1.10701e+13	6.44533	0.998412	0.999205	4.05429e+10	1.20915e+10
Fe_1-14toFe_1-6	3.84798	0.156	4.59075	0.999992	1.4565e-09	TRUE	18.9794	0.737225	0.220341	0.0643406	0.160589	5.5639e+13	8.85522e+12	4.55932	0.989531	0.994738	2.10971e+10	1.61016e+10
Fe_1-14toFe_1-5	3.86818	0.156	4.98191	0.999996	1.08729e-09	TRUE	19.4973	0.915913	0.26108	0.10508	0.183848	5.9532e+13	9.4748e+12	10.197	0.999963	0.999981	2.26922e+10	7.96931e+09
Fe_1-15toFe_1-6	3.84971	0.132	4.79869	0.999981	5.62175e-09	TRUE	19.6494	0.939203	0.203982	0.0719822	0.195721	6.14242e+13	9.77596e+12	4.57973	0.989742	0.994845	5.89403e+10	3.36185e+10
Fe_1-15toFe_1-5	3.86691	0.097	4.7341	0.999982	5.48644e-09	TRUE	19.8049	0.971751	0.208764	0.111764	0.205266	62904211567367	1.00115e+13	10.5988	0.999975	0.999988	2.34945e+11	6.62218e+10
Fe_1-15toFe_1-7	3.74911	0.099	4.04989	0.999999	3.4209e-10	TRUE	20.7268	1.11416	0.163319	0.0643191	0.275108	7.28236e+13	1.15902e+13	2.83167	0.941086	0.969649	2.44107e+11	1.18802e+11
Fe_1-15toFe_1-8	3.85767	0.106	4.90542	0.999994	1.80932e-09	TRUE	20.1532	0.994068	0.210056	0.104056	0.202647	6.25016e+13	9.94744e+12	9.14213	0.999893	0.999946	1.64803e+11	5.39878e+10
Fe_1-16toFe_1-6	3.73584	0.23	5.29841	0.999996	1.26412e-09	TRUE	20.214	1.01861	0.349694	0.119694	0.192249	60876935578728	9.68887e+12	12.2686	0.999995	0.999998	1.32569e+09	3.18274e+08
Fe_1-16toFe_1-5	3.81658	0.208	5.16172	1	1.0226e-10	TRUE	19.5453	0.898556	0.311475	0.103475	0.174081	5.7929e+13	9.21969e+12	10.2591	0.999965	0.999982	2.95435e+09	1.11073e+09
Fe_1-16toFe_1-8	3.90811	0.247	6.65471	0.999999	6.25989e-10	TRUE	21.3883	1.3737	0.427211	0.180211	0.206425	6.30815e+13	1.00397e+13	23.1113	1	1	7.11713e+08	3.09774e+07
Fe_1-16toFe_1-7	4.33276	0.196	5.72279	0.999992	4.75395e-09	TRUE	21.1779	1.37888	0.332546	0.136546	0.240945	6.81522e+13	1.08468e+13	12.2581	0.999995	0.999998	5.52896e+09	6.91082e+08
